# Supplementary material for: COPS: A Sensitive and Accurate Tool for Detecting Somatic Copy Number Alterations Using Short-Read Sequence Data from Paired Samples
Source: PubMed Central journal article supplement (PMC3478291; doi:10.1371/journal.pone.0047812), 2012-10-22

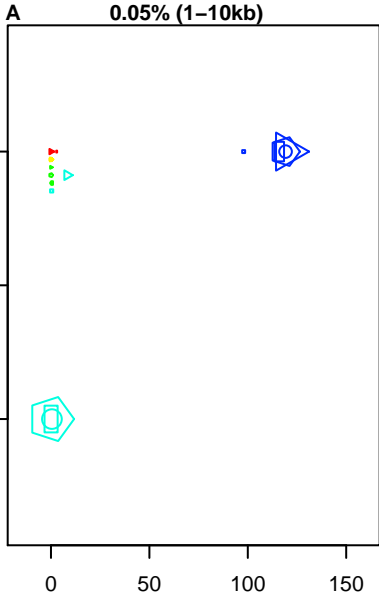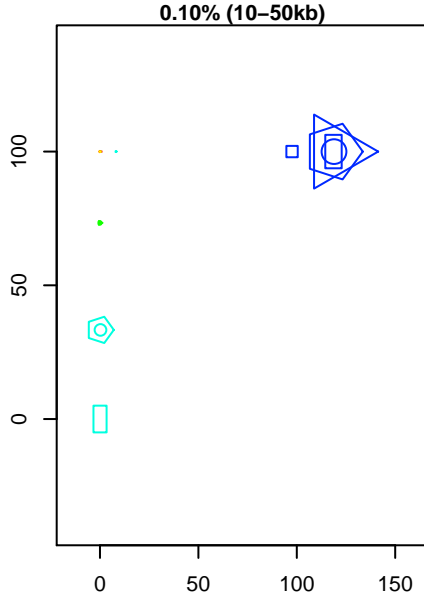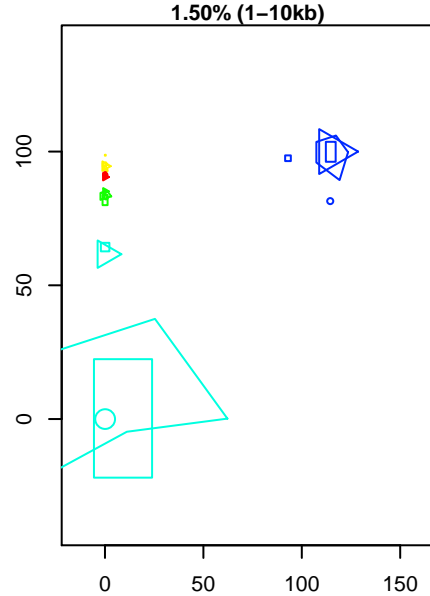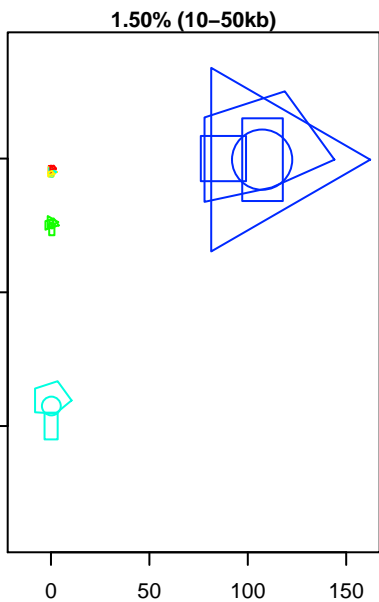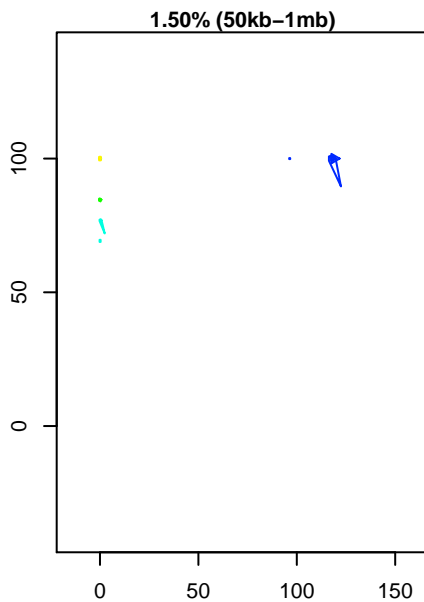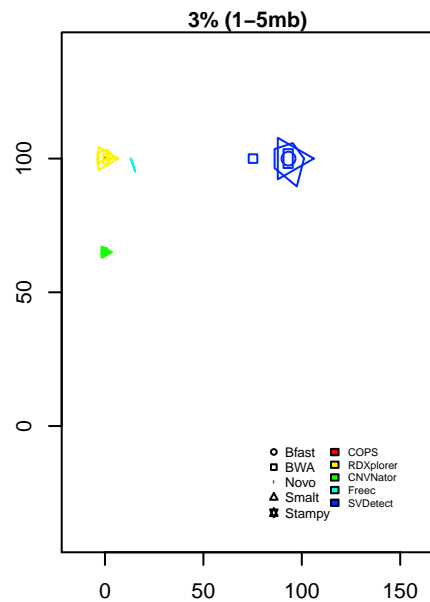

- Bfast
- BWA
- Novo
- △ Small
- ★ Stamps
- COPS
- RDXplorer
- CNVnator
- Freec
- SVDetect

Read length (36 nts)

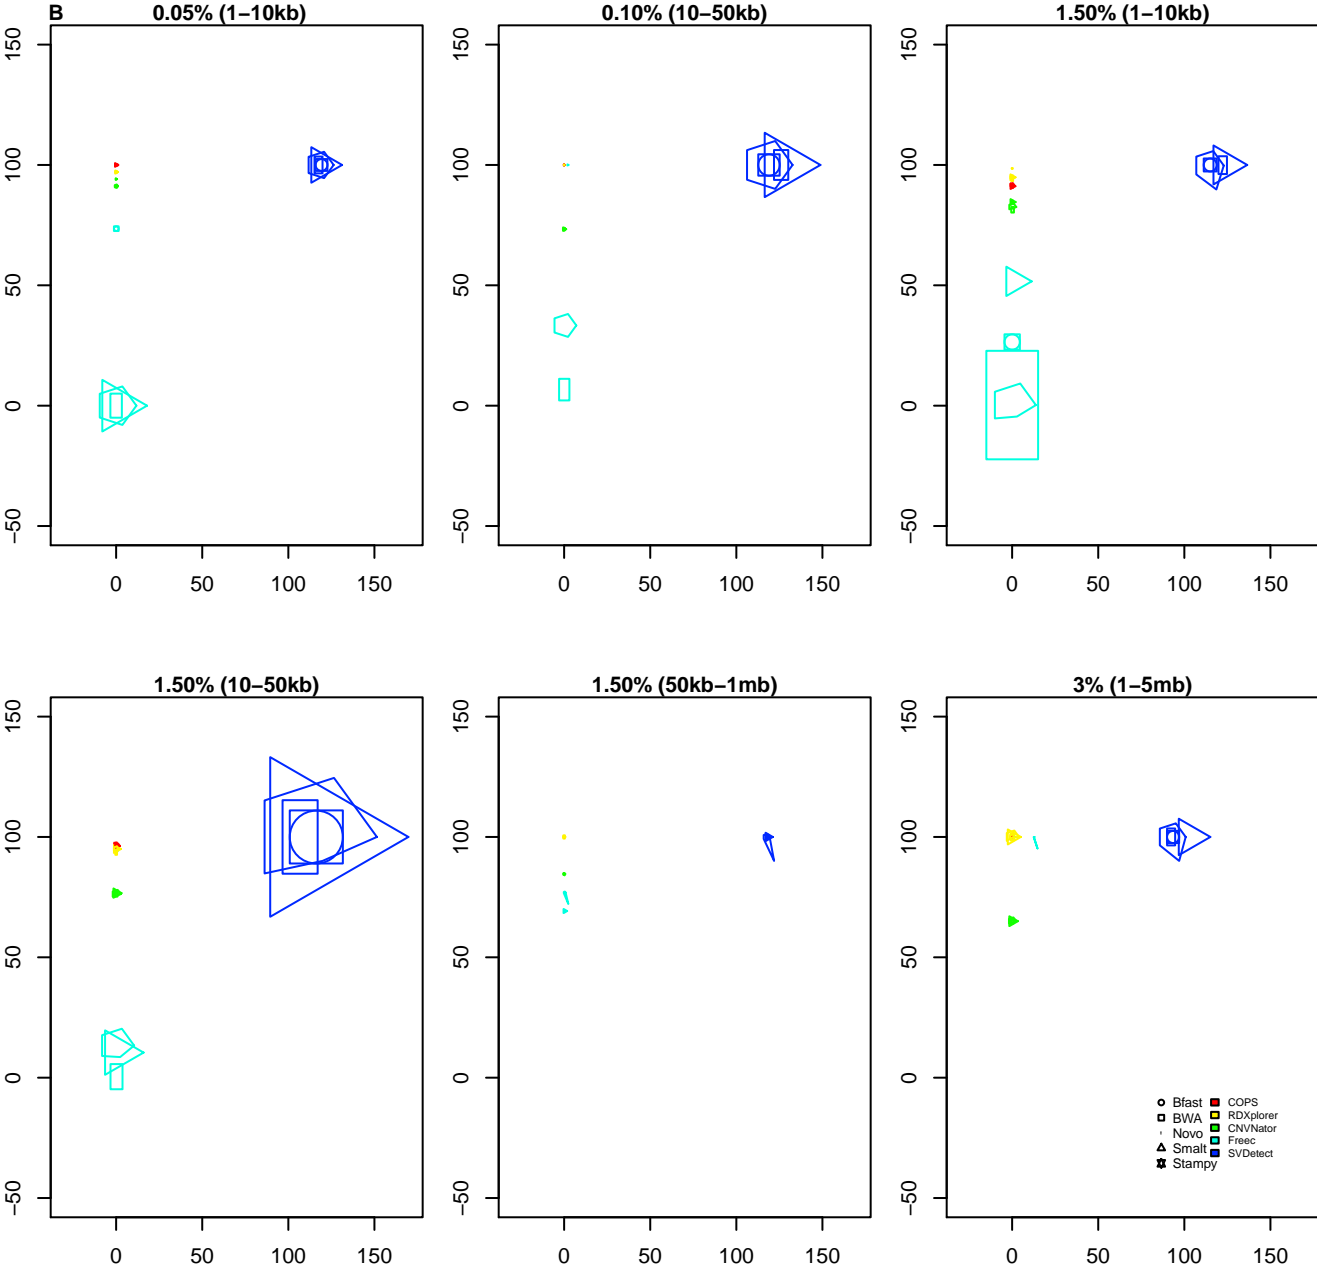

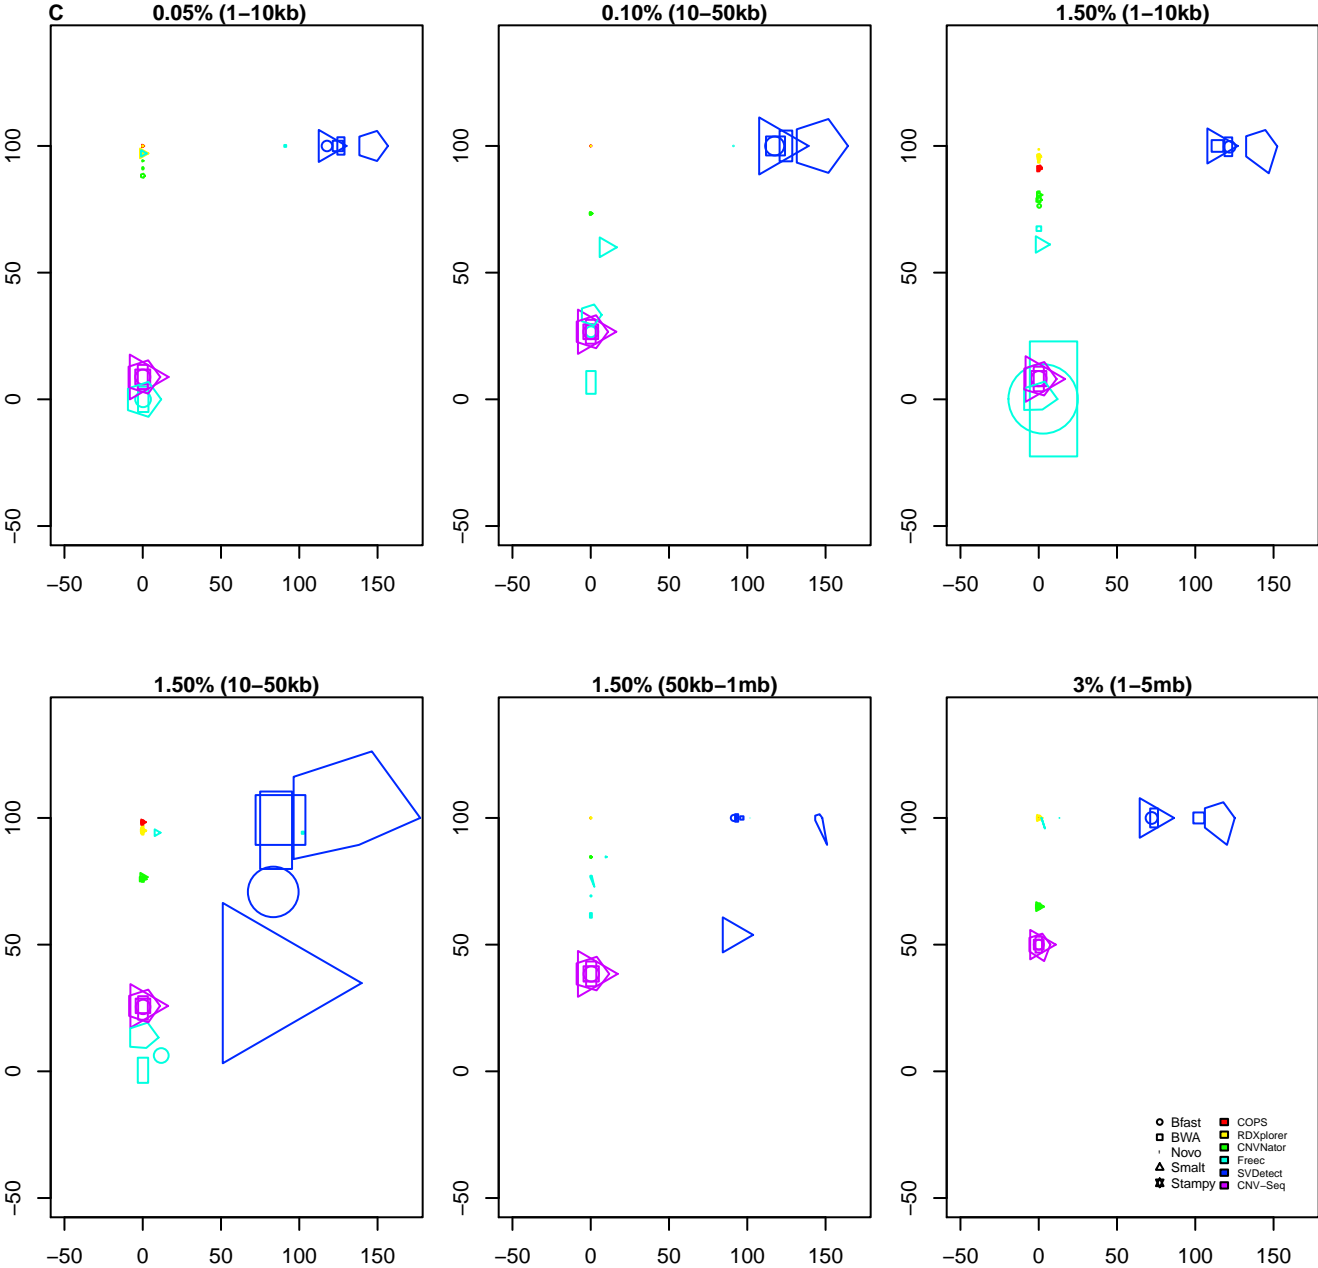

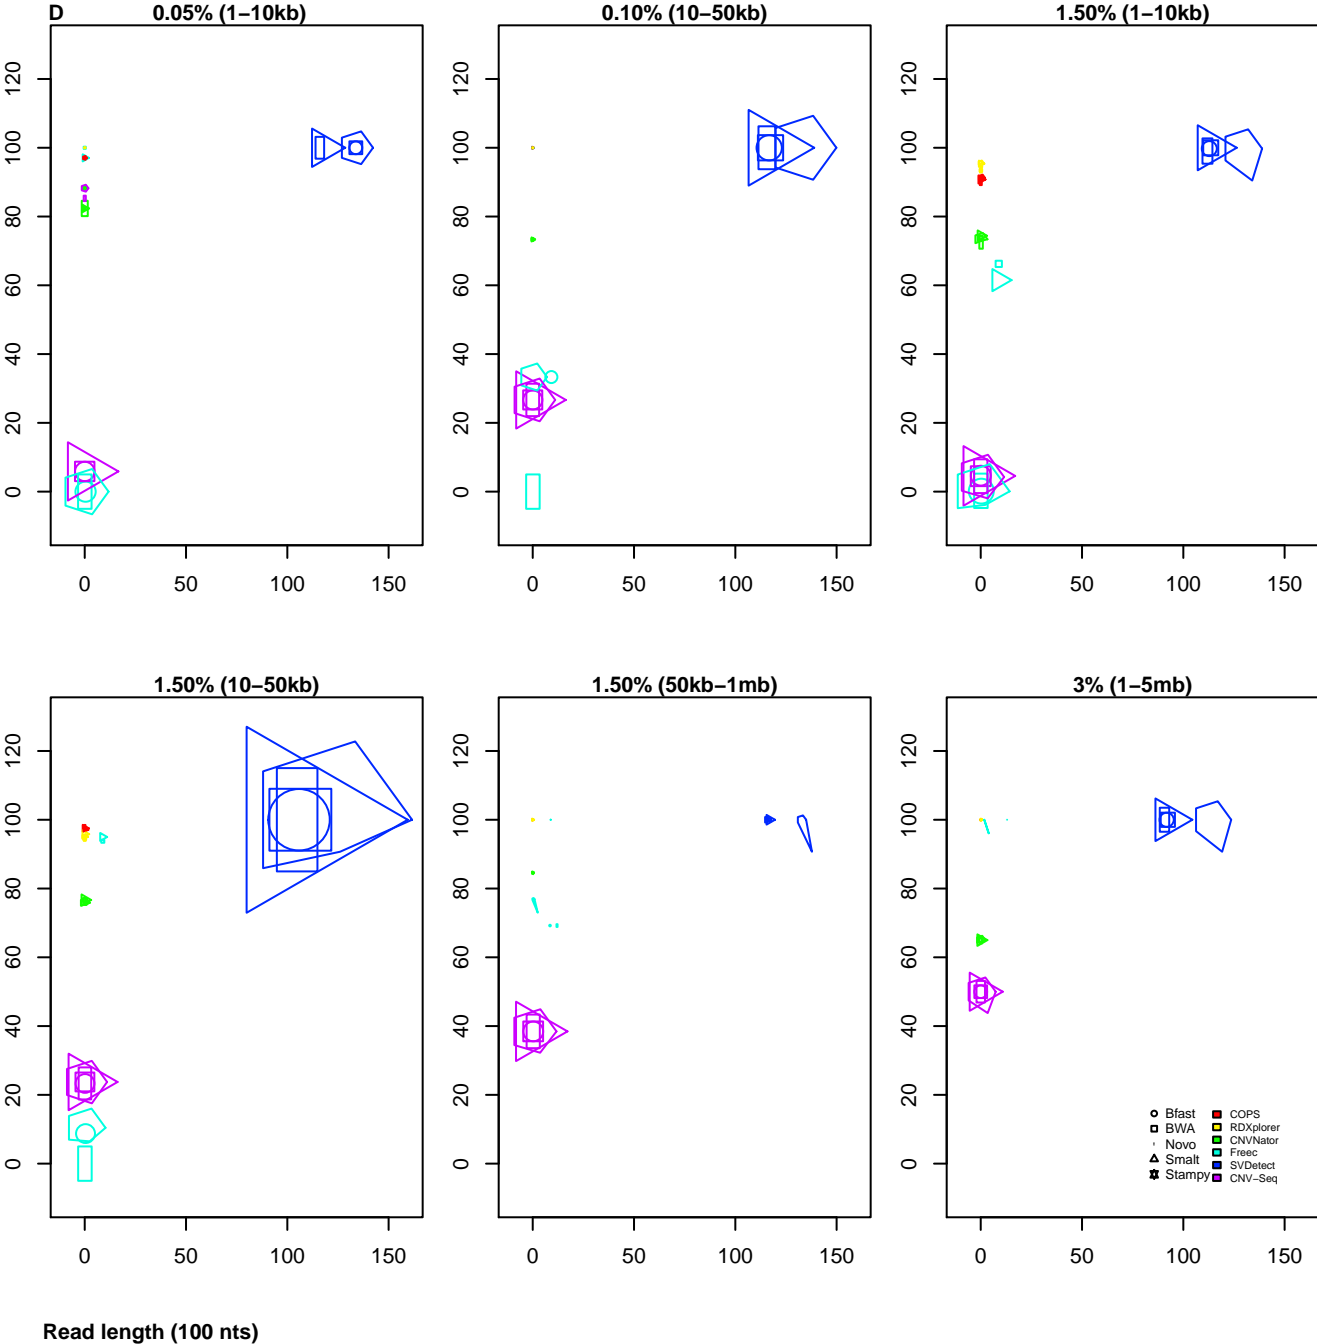

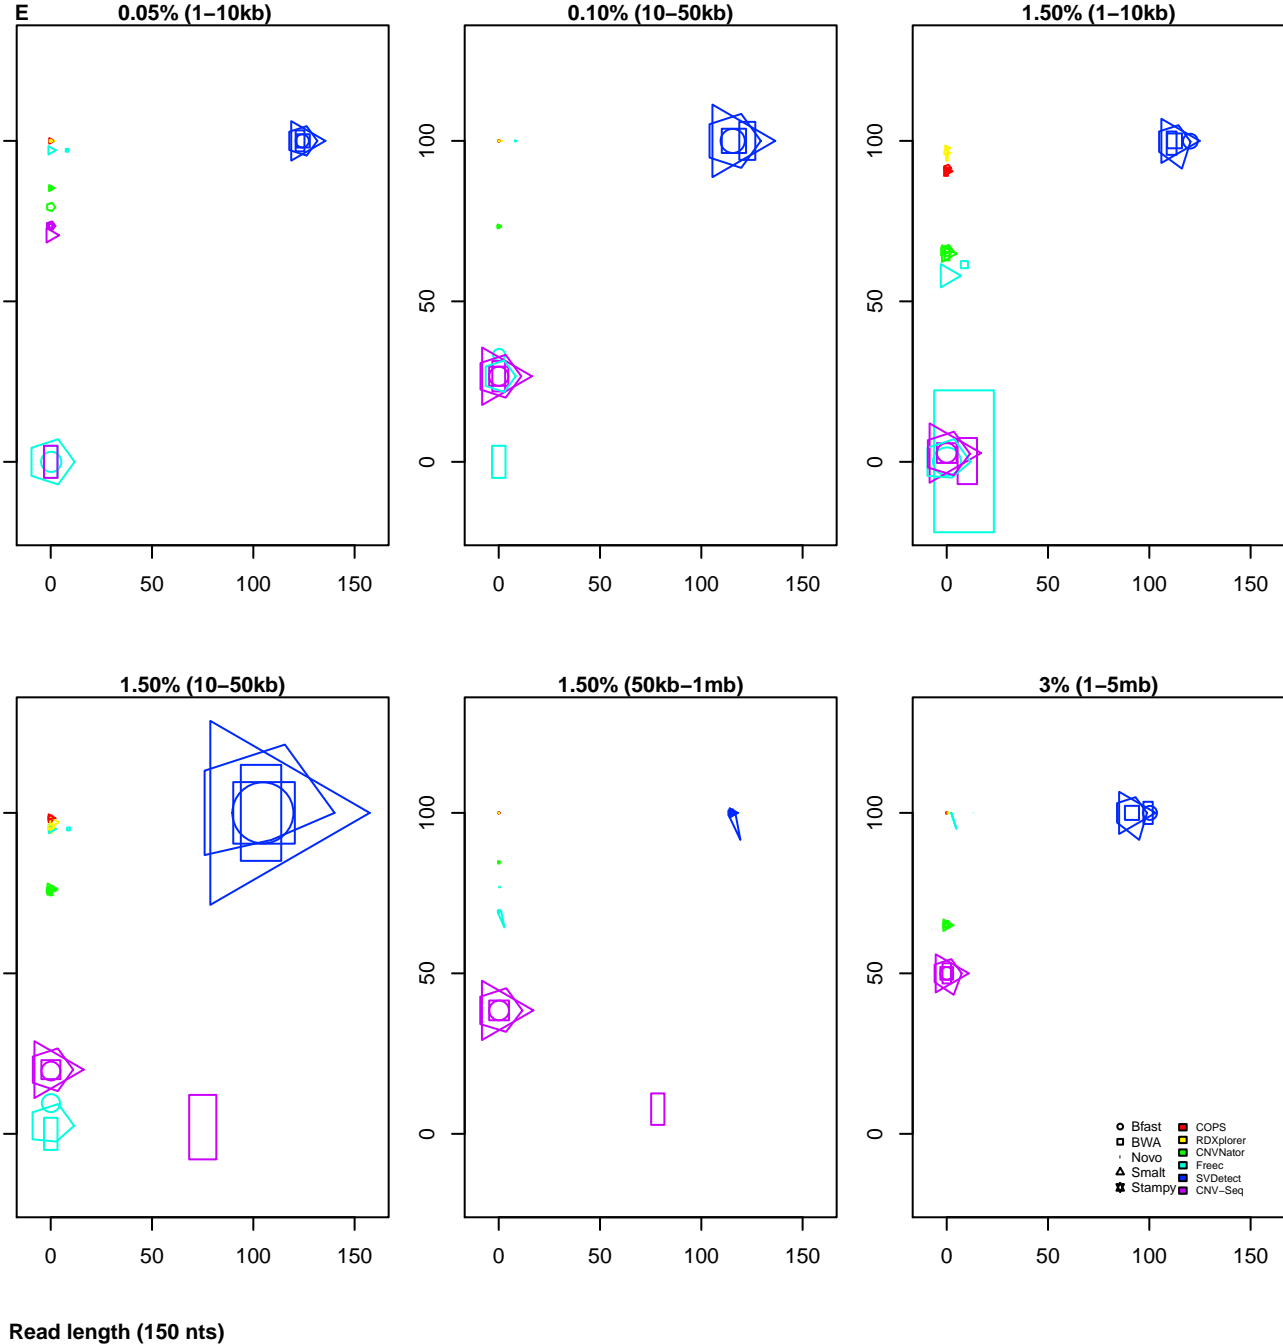

Supplement: pone.0047812.s004.pdf [file pone.0047812.s004.pdf]
