# Supplementary material for: COPS: A Sensitive and Accurate Tool for Detecting Somatic Copy Number Alterations Using Short-Read Sequence Data from Paired Samples
Source: PubMed Central journal article supplement (PMC3478291; doi:10.1371/journal.pone.0047812), 2012-10-22

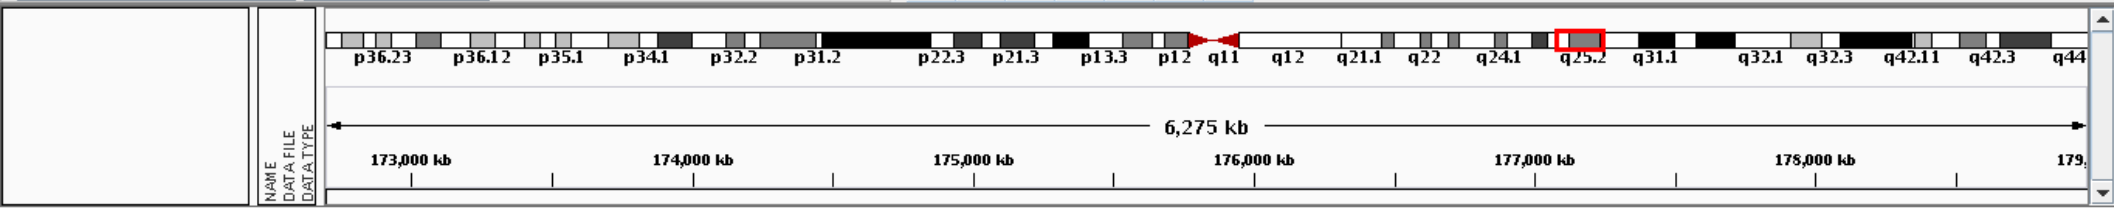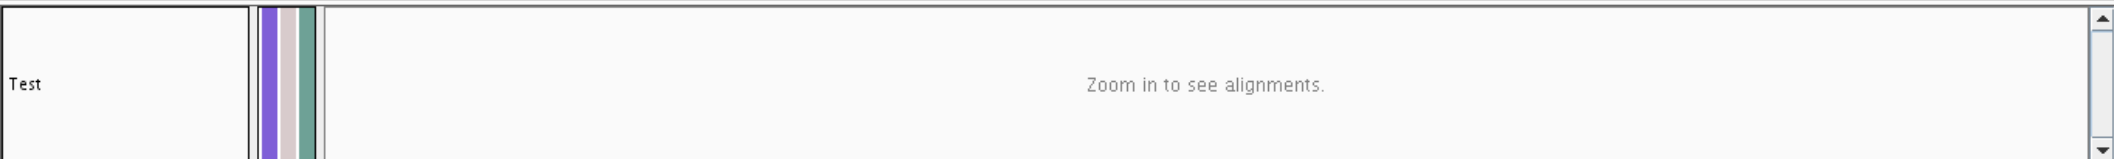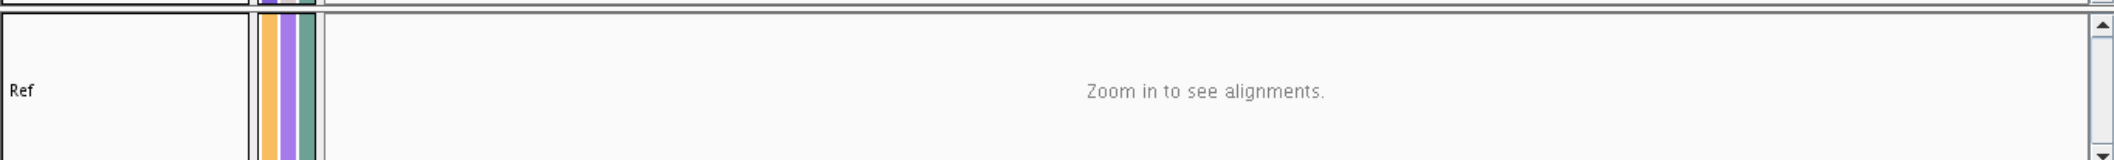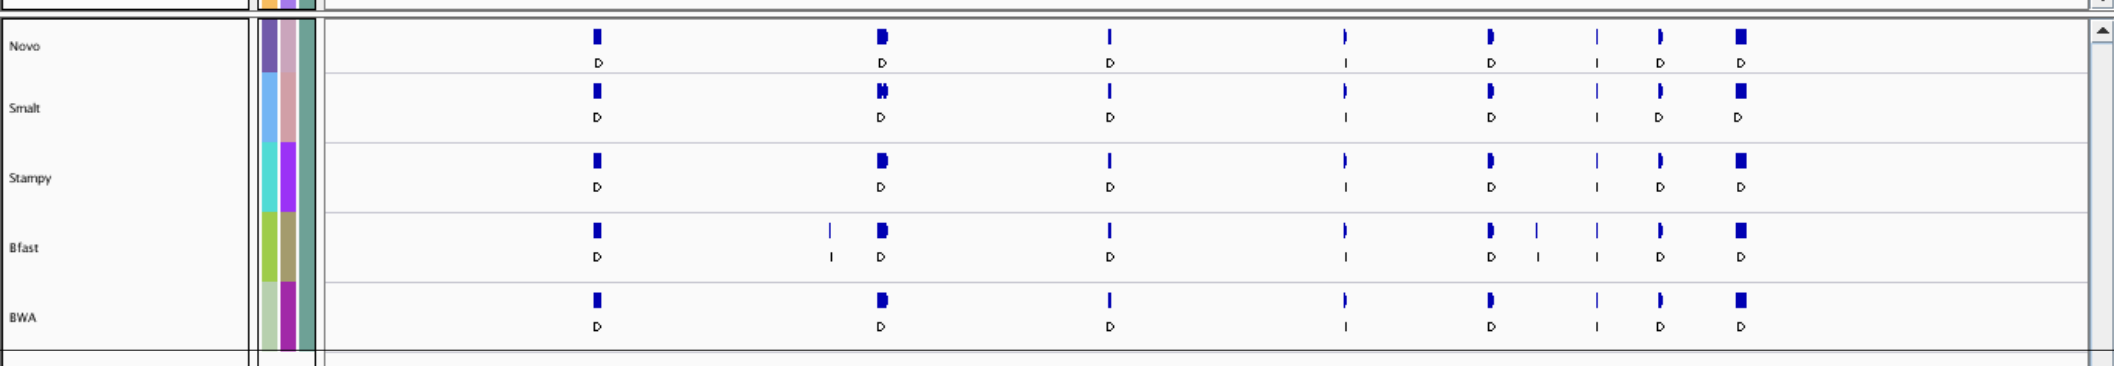

Supplement: pone.0047812.s006.pdf [file pone.0047812.s006.pdf]
