# Supplementary material for: COPS: A Sensitive and Accurate Tool for Detecting Somatic Copy Number Alterations Using Short-Read Sequence Data from Paired Samples
Source: PubMed Central journal article supplement (PMC3478291; doi:10.1371/journal.pone.0047812), 2012-10-22
Supplement: pone.0047812.s008.pdf [file pone.0047812.s008.pdf]

Supporting Table 1. Performance of COPS at varying bin sizes for binning read depths and step sizes for smoothening the log<sub>2</sub>ratios

A

| 0.05% (1-10kb) |          |           | 36     |        |       | 50     |        |      | 76     |        |      | 100   |       |       | 150    |        |      |      |
|----------------|----------|-----------|--------|--------|-------|--------|--------|------|--------|--------|------|-------|-------|-------|--------|--------|------|------|
| Aligner        | Bin size | Step size | TP     | FP     | SD    | TP     | FP     | SD   | TP     | FP     | SD   | TP    | FP    | SD    | TP     | FP     | SD   |      |
| Bfast          | 60       | 3         | 2.94   | 0.19   | 98.65 | 100.00 | 0.05   | 7.84 | 100.00 | 0.08   | 7.87 | 2.94  | 0.27  | 98.80 | 100.00 | 0.07   | 7.50 |      |
|                |          | 4         | 2.94   | 0.19   | 98.65 | 100.00 | 0.06   | 7.35 | 100.00 | 0.08   | 7.87 | 2.94  | 0.27  | 98.80 | 100.00 | 0.07   | 7.50 |      |
|                |          | 5         | 2.94   | 0.19   | 98.65 | 100.00 | 0.08   | 6.16 | 100.00 | 0.08   | 7.87 | 2.94  | 0.27  | 98.80 | 100.00 | 0.07   | 7.50 |      |
|                |          | 6         | 2.94   | 0.19   | 98.65 | 100.00 | 0.08   | 6.09 | 100.00 | 0.08   | 7.87 | 2.94  | 0.27  | 98.80 | 100.00 | 0.07   | 7.50 |      |
|                | 50       | 3         | 100.00 | 0.10   | 6.85  | 100.00 | 0.07   | 7.80 | 100.00 | 0.10   | 5.25 | 97.06 | 0.17  | 9.09  | 100.00 | 0.11   | 7.11 |      |
|                |          | 4         | 100.00 | 0.10   | 6.85  | 100.00 | 0.09   | 7.42 | 100.00 | 0.10   | 5.25 | 97.06 | 0.17  | 9.09  | 100.00 | 0.11   | 7.11 |      |
|                |          | 5         | 100.00 | 0.10   | 6.85  | 100.00 | 0.10   | 7.47 | 100.00 | 0.10   | 5.25 | 97.06 | 0.17  | 9.09  | 100.00 | 0.11   | 7.11 |      |
|                |          | 6         | 100.00 | 0.10   | 6.85  | 100.00 | 0.11   | 7.26 | 100.00 | 0.10   | 5.25 | 97.06 | 0.17  | 9.09  | 100.00 | 0.11   | 7.11 |      |
|                | BWA      | 60        | 3      | 97.06  | 0.02  | 11.78  | 100.00 | 0.00 | 4.77   | 100.00 | 0.00 | 8.31  | 97.06 | 0.00  | 9.59   | 100.00 | 0.01 | 7.93 |
|                |          |           | 4      | 97.06  | 0.02  | 11.78  | 100.00 | 0.00 | 4.77   | 100.00 | 0.00 | 8.31  | 97.06 | 0.00  | 9.59   | 100.00 | 0.01 | 7.93 |
|                |          |           | 5      | 97.06  | 0.02  | 11.78  | 100.00 | 0.00 | 4.50   | 100.00 | 0.00 | 8.31  | 97.06 | 0.00  | 9.59   | 100.00 | 0.01 | 7.93 |
|                |          |           | 6      | 97.06  | 0.02  | 11.78  | 100.00 | 0.00 | 4.48   | 100.00 | 0.00 | 8.31  | 97.06 | 0.00  | 9.59   | 100.00 | 0.01 | 7.93 |
| 50             |          | 3         | 97.06  | 0.03   | 11.20 | 100.00 | 0.00   | 5.22 | 100.00 | 0.00   | 5.22 | 97.06 | 0.00  | 8.95  | 100.00 | 0.03   | 7.31 |      |
|                |          | 4         | 97.06  | 0.03   | 11.20 | 100.00 | 0.00   | 4.94 | 100.00 | 0.00   | 5.22 | 97.06 | 0.00  | 8.95  | 100.00 | 0.03   | 7.31 |      |
|                |          | 5         | 97.06  | 0.03   | 11.20 | 100.00 | 0.00   | 4.08 | 100.00 | 0.00   | 5.22 | 97.06 | 0.00  | 8.95  | 100.00 | 0.03   | 7.31 |      |
|                |          | 6         | 97.06  | 0.03   | 11.20 | 100.00 | 0.00   | 3.86 | 100.00 | 0.00   | 5.22 | 97.06 | 0.00  | 8.95  | 100.00 | 0.03   | 7.31 |      |
| Novo           | 60       | 3         | 2.94   | 0.09   | 98.65 | 97.06  | 0.00   | 8.69 | 100.00 | 0.01   | 7.95 | 2.94  | 0.10  | 98.86 | 97.06  | 0.04   | 8.67 |      |
|                |          | 4         | 2.94   | 0.09   | 98.65 | 100.00 | 0.00   | 4.13 | 100.00 | 0.01   | 7.95 | 2.94  | 0.10  | 98.86 | 97.06  | 0.04   | 8.67 |      |
|                |          | 5         | 2.94   | 0.09   | 98.65 | 100.00 | 0.00   | 4.40 | 100.00 | 0.01   | 7.95 | 2.94  | 0.10  | 98.86 | 97.06  | 0.04   | 8.67 |      |
|                |          | 6         | 2.94   | 0.09   | 98.65 | 100.00 | 0.00   | 4.14 | 100.00 | 0.01   | 7.95 | 2.94  | 0.10  | 98.86 | 97.06  | 0.04   | 8.67 |      |
|                | 50       | 3         | 100.00 | 0.00   | 3.63  | 100.00 | 0.01   | 4.25 | 100.00 | 0.02   | 5.07 | 97.06 | 0.02  | 8.78  | 100.00 | 0.07   | 7.26 |      |
|                |          | 4         | 100.00 | 0.00   | 3.63  | 100.00 | 0.01   | 3.80 | 100.00 | 0.02   | 5.07 | 97.06 | 0.02  | 8.78  | 100.00 | 0.07   | 7.26 |      |
|                |          | 5         | 100.00 | 0.00   | 3.63  | 100.00 | 0.01   | 4.70 | 100.00 | 0.02   | 5.07 | 97.06 | 0.02  | 8.78  | 100.00 | 0.07   | 7.26 |      |
|                |          | 6         | 100.00 | 0.00   | 3.63  | 100.00 | 0.01   | 3.93 | 100.00 | 0.02   | 5.07 | 97.06 | 0.02  | 8.78  | 100.00 | 0.07   | 7.26 |      |
|                | Smalt    | 60        | 3      | 100.00 | 2.46  | 8.76   | 100.00 | 0.38 | 6.59   | 100.00 | 0.02 | 8.52  | 94.12 | 0.00  | 11.68  | 100.00 | 0.02 | 7.65 |
|                |          |           | 4      | 100.00 | 2.46  | 8.76   | 100.00 | 0.42 | 6.78   | 100.00 | 0.02 | 8.52  | 94.12 | 0.00  | 11.68  | 100.00 | 0.02 | 7.65 |
|                |          |           | 5      | 100.00 | 2.46  | 8.76   | 100.00 | 0.48 | 7.01   | 100.00 | 0.02 | 8.52  | 94.12 | 0.00  | 11.68  | 100.00 | 0.02 | 7.65 |
|                |          |           | 6      | 100.00 | 2.46  | 8.76   | 100.00 | 0.52 | 6.92   | 100.00 | 0.02 | 8.52  | 94.12 | 0.00  | 11.68  | 100.00 | 0.02 | 7.65 |

|        |    |   |        |      |       |        |      |      |        |      |      |       |      |       |        |      |      |
|--------|----|---|--------|------|-------|--------|------|------|--------|------|------|-------|------|-------|--------|------|------|
|        | 50 | 3 | 100.00 | 2.89 | 7.08  | 100.00 | 0.60 | 5.39 | 100.00 | 0.02 | 5.70 | 97.06 | 0.03 | 9.04  | 100.00 | 0.05 | 7.29 |
|        |    | 4 | 100.00 | 2.89 | 7.08  | 100.00 | 0.66 | 5.47 | 100.00 | 0.02 | 5.70 | 97.06 | 0.03 | 9.04  | 100.00 | 0.05 | 7.29 |
|        |    | 5 | 100.00 | 2.89 | 7.08  | 100.00 | 0.70 | 5.22 | 100.00 | 0.02 | 5.70 | 97.06 | 0.03 | 9.04  | 100.00 | 0.05 | 7.29 |
|        |    | 6 | 100.00 | 2.89 | 7.08  | 100.00 | 0.75 | 5.52 | 100.00 | 0.02 | 5.70 | 97.06 | 0.03 | 9.04  | 100.00 | 0.05 | 7.29 |
| Stampy | 60 | 3 | 94.12  | 0.00 | 11.35 | 100.00 | 0.00 | 7.71 | 100.00 | 0.01 | 8.00 | 94.12 | 0.00 | 10.23 | 100.00 | 0.05 | 8.52 |
|        |    | 4 | 94.12  | 0.00 | 11.35 | 100.00 | 0.00 | 7.37 | 100.00 | 0.01 | 8.00 | 94.12 | 0.00 | 10.23 | 100.00 | 0.05 | 8.52 |
|        |    | 5 | 94.12  | 0.00 | 11.35 | 100.00 | 0.00 | 6.92 | 100.00 | 0.01 | 8.00 | 94.12 | 0.00 | 10.23 | 100.00 | 0.05 | 8.52 |
|        |    | 6 | 94.12  | 0.00 | 11.35 | 100.00 | 0.00 | 6.79 | 100.00 | 0.01 | 8.00 | 94.12 | 0.00 | 10.23 | 100.00 | 0.05 | 8.52 |
|        | 50 | 3 | 100.00 | 0.00 | 9.18  | 100.00 | 0.00 | 7.60 | 100.00 | 0.01 | 5.37 | 97.06 | 0.00 | 8.67  | 100.00 | 0.08 | 9.24 |
|        |    | 4 | 100.00 | 0.00 | 9.18  | 100.00 | 0.00 | 7.38 | 100.00 | 0.01 | 5.37 | 97.06 | 0.00 | 8.67  | 100.00 | 0.08 | 9.24 |
|        |    | 5 | 100.00 | 0.00 | 9.18  | 100.00 | 0.00 | 7.01 | 100.00 | 0.01 | 5.37 | 97.06 | 0.00 | 8.67  | 100.00 | 0.08 | 9.24 |
|        |    | 6 | 100.00 | 0.00 | 9.18  | 100.00 | 0.00 | 6.75 | 100.00 | 0.01 | 5.37 | 97.06 | 0.00 | 8.67  | 100.00 | 0.08 | 9.20 |

## B

| 0.10% (10-50kb) |          |           | 36     |      |      | 50     |      |      | 76     |      |      | 100    |      |      | 150    |      |      |
|-----------------|----------|-----------|--------|------|------|--------|------|------|--------|------|------|--------|------|------|--------|------|------|
| Aligner         | Bin size | Step size | TP     | FP   | SD   | TP     | FP   | SD   | TP     | FP   | SD   | TP     | FP   | SD   | TP     | FP   | SD   |
| Bfast           | 60       | 3         | 100.00 | 0.82 | 2.08 | 100.00 | 0.36 | 2.34 | 100.00 | 0.14 | 2.62 | 100.00 | 0.27 | 3.32 | 100.00 | 0.22 | 3.06 |
|                 |          | 4         | 100.00 | 0.82 | 2.08 | 100.00 | 0.36 | 2.34 | 100.00 | 0.14 | 2.62 | 100.00 | 0.27 | 3.32 | 100.00 | 0.22 | 3.06 |
|                 |          | 5         | 100.00 | 0.82 | 2.08 | 100.00 | 0.36 | 2.34 | 100.00 | 0.14 | 2.62 | 100.00 | 0.27 | 3.32 | 100.00 | 0.22 | 3.06 |
|                 |          | 6         | 100.00 | 0.82 | 2.08 | 100.00 | 0.36 | 2.34 | 100.00 | 0.14 | 2.62 | 100.00 | 0.27 | 3.32 | 100.00 | 0.22 | 3.06 |
|                 | 50       | 3         | 100.00 | 0.84 | 1.91 | 100.00 | 0.37 | 1.65 | 100.00 | 0.16 | 2.32 | 100.00 | 0.29 | 3.44 | 100.00 | 0.27 | 2.92 |
|                 |          | 4         | 100.00 | 0.84 | 1.91 | 100.00 | 0.37 | 1.65 | 100.00 | 0.16 | 2.32 | 100.00 | 0.29 | 3.44 | 100.00 | 0.27 | 2.92 |
|                 |          | 5         | 100.00 | 0.84 | 1.91 | 100.00 | 0.37 | 1.65 | 100.00 | 0.16 | 2.32 | 100.00 | 0.29 | 3.44 | 100.00 | 0.27 | 2.92 |
|                 |          | 6         | 100.00 | 0.84 | 1.91 | 100.00 | 0.37 | 1.65 | 100.00 | 0.16 | 2.32 | 100.00 | 0.29 | 3.44 | 100.00 | 0.27 | 2.92 |
| BWA             | 60       | 3         | 100.00 | 0.02 | 2.38 | 100.00 | 0.00 | 2.08 | 100.00 | 0.00 | 2.26 | 100.00 | 0.00 | 2.32 | 100.00 | 0.01 | 3.03 |
|                 |          | 4         | 100.00 | 0.02 | 2.38 | 100.00 | 0.00 | 2.08 | 100.00 | 0.00 | 2.26 | 100.00 | 0.00 | 2.32 | 100.00 | 0.01 | 3.03 |
|                 |          | 5         | 100.00 | 0.02 | 2.38 | 100.00 | 0.00 | 2.08 | 100.00 | 0.00 | 2.26 | 100.00 | 0.00 | 2.32 | 100.00 | 0.01 | 3.03 |
|                 |          | 6         | 100.00 | 0.02 | 2.38 | 100.00 | 0.00 | 2.08 | 100.00 | 0.00 | 2.26 | 100.00 | 0.00 | 2.32 | 100.00 | 0.01 | 3.03 |
|                 | 50       | 3         | 100.00 | 0.03 | 2.12 | 100.00 | 0.00 | 2.25 | 100.00 | 0.00 | 2.07 | 100.00 | 0.00 | 2.45 | 100.00 | 0.04 | 2.60 |
|                 |          | 4         | 100.00 | 0.03 | 2.12 | 100.00 | 0.00 | 2.25 | 100.00 | 0.00 | 2.07 | 100.00 | 0.00 | 2.45 | 100.00 | 0.04 | 2.60 |
|                 |          | 5         | 100.00 | 0.03 | 2.12 | 100.00 | 0.00 | 2.25 | 100.00 | 0.00 | 2.07 | 100.00 | 0.00 | 2.45 | 100.00 | 0.04 | 2.60 |

|        |    |   |        |      |      |        |      |      |        |       |        |        |      |      |        |      |      |
|--------|----|---|--------|------|------|--------|------|------|--------|-------|--------|--------|------|------|--------|------|------|
|        |    | 6 | 100.00 | 0.03 | 2.12 | 100.00 | 0.00 | 2.25 | 100.00 | 0.00  | 2.07   | 100.00 | 0.00 | 2.45 | 100.00 | 0.04 | 2.60 |
| Novo   | 60 | 3 | 100.00 | 0.00 | 1.89 | 100.00 | 0.00 | 1.25 | 100.00 | 0.01  | 2.51   | 100.00 | 0.01 | 2.37 | 100.00 | 0.04 | 2.70 |
|        |    | 4 | 100.00 | 0.00 | 1.89 | 100.00 | 0.00 | 1.25 | 100.00 | 0.01  | 2.51   | 100.00 | 0.01 | 2.37 | 100.00 | 0.04 | 2.70 |
|        |    | 5 | 100.00 | 0.00 | 1.89 | 100.00 | 0.00 | 1.25 | 100.00 | 0.01  | 2.51   | 100.00 | 0.01 | 2.37 | 100.00 | 0.04 | 2.70 |
|        |    | 6 | 100.00 | 0.00 | 1.89 | 100.00 | 0.00 | 1.25 | 100.00 | 0.01  | 2.51   | 100.00 | 0.01 | 2.37 | 100.00 | 0.04 | 2.70 |
|        | 50 | 3 | 100.00 | 0.00 | 1.51 | 100.00 | 0.00 | 1.51 | 100.00 | 0.01  | 2.41   | 100.00 | 0.02 | 2.50 | 100.00 | 0.08 | 2.26 |
|        |    | 4 | 100.00 | 0.00 | 1.51 | 100.00 | 0.00 | 1.51 | 100.00 | 0.01  | 2.41   | 100.00 | 0.02 | 2.50 | 100.00 | 0.08 | 2.26 |
|        |    | 5 | 100.00 | 0.00 | 1.51 | 100.00 | 0.00 | 1.51 | 100.00 | 0.01  | 2.41   | 100.00 | 0.02 | 2.50 | 100.00 | 0.08 | 2.26 |
|        |    | 6 | 100.00 | 0.00 | 1.51 | 100.00 | 0.00 | 1.51 | 100.00 | 0.01  | 2.41   | 100.00 | 0.02 | 2.50 | 100.00 | 0.08 | 2.26 |
| Smalt  | 60 | 3 | 100.00 | 0.03 | 1.48 | 100.00 | 0.01 | 3.35 | 26.67  | 88.53 | 207.56 | 100.00 | 0.00 | 3.86 | 100.00 | 0.03 | 2.79 |
|        |    | 4 | 100.00 | 0.03 | 1.48 | 100.00 | 0.01 | 3.35 | 26.67  | 88.53 | 207.56 | 100.00 | 0.00 | 3.86 | 100.00 | 0.03 | 2.79 |
|        |    | 5 | 100.00 | 0.03 | 1.48 | 100.00 | 0.01 | 3.35 | 26.67  | 88.53 | 207.56 | 100.00 | 0.00 | 3.86 | 100.00 | 0.03 | 2.79 |
|        |    | 6 | 100.00 | 0.03 | 1.48 | 100.00 | 0.01 | 3.35 | 26.67  | 88.53 | 207.56 | 100.00 | 0.00 | 3.86 | 100.00 | 0.03 | 2.79 |
|        | 50 | 3 | 100.00 | 0.04 | 2.23 | 100.00 | 0.06 | 3.11 | 26.67  | 88.41 | 202.08 | 100.00 | 0.00 | 3.66 | 100.00 | 0.18 | 2.73 |
|        |    | 4 | 100.00 | 0.04 | 2.23 | 100.00 | 0.06 | 3.11 | 26.67  | 88.41 | 202.08 | 100.00 | 0.00 | 3.66 | 100.00 | 0.18 | 2.73 |
|        |    | 5 | 100.00 | 0.04 | 2.23 | 100.00 | 0.06 | 3.11 | 26.67  | 88.41 | 202.08 | 100.00 | 0.00 | 3.66 | 100.00 | 0.18 | 2.73 |
|        |    | 6 | 100.00 | 0.04 | 2.23 | 100.00 | 0.06 | 3.11 | 26.67  | 88.41 | 202.08 | 100.00 | 0.00 | 3.66 | 100.00 | 0.18 | 2.73 |
| Stampy | 60 | 3 | 100.00 | 0.00 | 2.08 | 100.00 | 0.00 | 1.55 | 100.00 | 0.00  | 2.54   | 100.00 | 0.01 | 2.43 | 100.00 | 0.06 | 3.24 |
|        |    | 4 | 100.00 | 0.00 | 2.08 | 100.00 | 0.00 | 1.55 | 100.00 | 0.00  | 2.54   | 100.00 | 0.01 | 2.43 | 100.00 | 0.06 | 3.24 |
|        |    | 5 | 100.00 | 0.00 | 2.08 | 100.00 | 0.00 | 1.55 | 100.00 | 0.00  | 2.54   | 100.00 | 0.01 | 2.43 | 100.00 | 0.06 | 3.24 |
|        |    | 6 | 100.00 | 0.00 | 2.08 | 100.00 | 0.00 | 1.55 | 100.00 | 0.00  | 2.54   | 100.00 | 0.01 | 2.43 | 100.00 | 0.06 | 3.24 |
|        | 50 | 3 | 100.00 | 0.00 | 1.89 | 100.00 | 0.00 | 2.33 | 100.00 | 0.01  | 2.22   | 100.00 | 0.01 | 3.43 | 100.00 | 0.09 | 3.09 |
|        |    | 4 | 100.00 | 0.00 | 1.89 | 100.00 | 0.00 | 2.33 | 100.00 | 0.01  | 2.22   | 100.00 | 0.01 | 3.43 | 100.00 | 0.09 | 3.09 |
|        |    | 5 | 100.00 | 0.00 | 1.89 | 100.00 | 0.00 | 2.33 | 100.00 | 0.01  | 2.22   | 100.00 | 0.01 | 3.43 | 100.00 | 0.09 | 3.09 |
|        |    | 6 | 100.00 | 0.00 | 1.89 | 100.00 | 0.00 | 2.33 | 100.00 | 0.01  | 2.22   | 100.00 | 0.01 | 3.43 | 100.00 | 0.09 | 3.09 |

C

| 1.50% (1-10kb) |          |           | 36    |      |       | 50    |      |       | 76    |      |       | 100   |      |       | 150   |      |       |
|----------------|----------|-----------|-------|------|-------|-------|------|-------|-------|------|-------|-------|------|-------|-------|------|-------|
| Aligner        | Bin size | Step size | TP    | FP   | SD    | TP    | FP   | SD    | TP    | FP   | SD    | TP    | FP   | SD    | TP    | FP   | SD    |
| Bfast          | 60       | 3         | 87.73 | 0.78 | 15.00 | 87.49 | 0.77 | 14.86 | 87.81 | 0.72 | 14.63 | 87.81 | 0.53 | 16.15 | 87.57 | 0.38 | 17.62 |
|                |          | 4         | 87.73 | 0.78 | 15.00 | 87.49 | 0.77 | 14.86 | 87.81 | 0.72 | 14.63 | 87.81 | 0.53 | 16.15 | 87.57 | 0.38 | 17.62 |
|                |          | 5         | 87.73 | 0.78 | 15.00 | 87.49 | 0.77 | 14.86 | 87.81 | 0.72 | 14.63 | 87.81 | 0.53 | 16.15 | 87.57 | 0.38 | 17.62 |

|        |    |   |       |      |       |       |      |       |       |      |       |       |      |       |       |      |       |
|--------|----|---|-------|------|-------|-------|------|-------|-------|------|-------|-------|------|-------|-------|------|-------|
|        |    | 6 | 87.73 | 0.78 | 15.00 | 87.49 | 0.77 | 14.86 | 87.81 | 0.72 | 14.63 | 87.81 | 0.53 | 16.15 | 87.57 | 0.38 | 17.62 |
|        | 50 | 3 | 90.62 | 0.80 | 13.72 | 90.94 | 0.79 | 13.21 | 91.26 | 0.76 | 13.06 | 90.86 | 0.56 | 14.74 | 90.70 | 0.43 | 16.04 |
|        |    | 4 | 90.62 | 0.80 | 13.72 | 90.94 | 0.79 | 13.21 | 91.26 | 0.76 | 13.06 | 90.86 | 0.56 | 14.74 | 90.70 | 0.43 | 16.04 |
|        |    | 5 | 90.62 | 0.80 | 13.72 | 90.94 | 0.79 | 13.21 | 91.26 | 0.76 | 13.06 | 90.86 | 0.56 | 14.74 | 90.70 | 0.43 | 16.04 |
|        |    | 6 | 90.62 | 0.80 | 13.72 | 90.94 | 0.79 | 13.21 | 91.26 | 0.76 | 13.06 | 90.86 | 0.56 | 14.74 | 90.70 | 0.43 | 16.04 |
| BWA    | 60 | 3 | 86.69 | 0.05 | 14.01 | 87.73 | 0.02 | 13.02 | 88.45 | 0.02 | 13.35 | 88.37 | 0.02 | 14.95 | 87.97 | 0.04 | 16.99 |
|        |    | 4 | 86.69 | 0.05 | 14.01 | 87.73 | 0.02 | 13.02 | 88.45 | 0.02 | 13.35 | 88.37 | 0.02 | 14.95 | 87.97 | 0.04 | 16.99 |
|        |    | 5 | 86.69 | 0.05 | 14.01 | 87.73 | 0.02 | 13.02 | 88.45 | 0.02 | 13.35 | 88.37 | 0.02 | 14.95 | 87.97 | 0.04 | 16.99 |
|        |    | 6 | 86.69 | 0.05 | 14.01 | 87.73 | 0.02 | 13.02 | 88.45 | 0.02 | 13.35 | 88.37 | 0.02 | 14.95 | 87.97 | 0.04 | 16.99 |
|        | 50 | 3 | 90.54 | 0.06 | 12.14 | 90.94 | 0.03 | 11.41 | 91.26 | 0.03 | 11.73 | 91.26 | 0.04 | 13.35 | 91.18 | 0.08 | 15.39 |
|        |    | 4 | 90.54 | 0.06 | 12.14 | 90.94 | 0.03 | 11.41 | 91.26 | 0.03 | 11.73 | 91.26 | 0.04 | 13.35 | 91.18 | 0.08 | 15.39 |
|        |    | 5 | 90.54 | 0.06 | 12.14 | 90.94 | 0.03 | 11.41 | 91.26 | 0.03 | 11.73 | 91.26 | 0.04 | 13.35 | 91.18 | 0.08 | 15.39 |
|        |    | 6 | 90.54 | 0.06 | 12.14 | 90.94 | 0.03 | 11.41 | 91.26 | 0.03 | 11.73 | 91.26 | 0.04 | 13.35 | 91.18 | 0.08 | 15.39 |
| Novo   | 60 | 3 | 88.29 | 0.01 | 11.39 | 88.05 | 0.01 | 11.91 | 88.05 | 0.53 | 13.48 | 88.37 | 0.44 | 15.45 | 88.05 | 0.32 | 17.67 |
|        |    | 4 | 88.29 | 0.01 | 11.39 | 88.05 | 0.01 | 11.91 | 88.05 | 0.53 | 13.48 | 88.37 | 0.44 | 15.45 | 88.05 | 0.32 | 17.67 |
|        |    | 5 | 88.29 | 0.01 | 11.39 | 88.05 | 0.01 | 11.91 | 88.05 | 0.53 | 13.48 | 88.37 | 0.44 | 15.45 | 88.05 | 0.32 | 17.67 |
|        |    | 6 | 88.29 | 0.01 | 11.39 | 88.05 | 0.01 | 11.91 | 88.05 | 0.53 | 13.48 | 88.37 | 0.44 | 15.45 | 88.05 | 0.32 | 17.67 |
|        | 50 | 3 | 91.50 | 0.02 | 10.05 | 91.66 | 0.03 | 10.38 | 91.50 | 0.55 | 11.77 | 91.26 | 0.45 | 14.01 | 91.42 | 0.37 | 15.97 |
|        |    | 4 | 91.50 | 0.02 | 10.05 | 91.66 | 0.03 | 10.38 | 91.50 | 0.55 | 11.77 | 91.26 | 0.45 | 14.01 | 91.42 | 0.37 | 15.97 |
|        |    | 5 | 91.50 | 0.02 | 10.05 | 91.66 | 0.03 | 10.38 | 91.50 | 0.55 | 11.77 | 91.26 | 0.45 | 14.01 | 91.42 | 0.37 | 15.97 |
|        |    | 6 | 91.50 | 0.02 | 10.05 | 91.66 | 0.03 | 10.38 | 91.50 | 0.55 | 11.77 | 91.26 | 0.45 | 14.01 | 91.42 | 0.37 | 15.97 |
| Smalt  | 60 | 3 | 87.81 | 0.04 | 12.91 | 87.73 | 0.02 | 13.09 | 87.81 | 0.02 | 13.97 | 87.41 | 0.02 | 16.48 | 86.77 | 0.04 | 17.60 |
|        |    | 4 | 87.81 | 0.04 | 12.91 | 87.73 | 0.02 | 13.09 | 87.81 | 0.02 | 13.97 | 87.41 | 0.02 | 16.48 | 86.77 | 0.04 | 17.60 |
|        |    | 5 | 87.81 | 0.00 | 12.91 | 87.73 | 0.02 | 13.09 | 87.81 | 0.02 | 13.97 | 87.41 | 0.02 | 16.48 | 86.77 | 0.04 | 17.60 |
|        |    | 6 | 87.81 | 0.00 | 12.91 | 87.73 | 0.02 | 13.09 | 87.81 | 0.02 | 13.97 | 87.41 | 0.02 | 16.48 | 86.77 | 0.04 | 17.60 |
|        | 50 | 3 | 91.66 | 0.00 | 10.94 | 91.26 | 0.03 | 11.43 | 90.62 | 0.02 | 12.49 | 89.90 | 0.03 | 15.05 | 89.90 | 0.08 | 16.22 |
|        |    | 4 | 91.66 | 0.00 | 10.94 | 91.26 | 0.03 | 11.43 | 90.62 | 0.02 | 12.49 | 89.90 | 0.03 | 15.05 | 89.90 | 0.08 | 16.22 |
|        |    | 5 | 91.66 | 0.00 | 10.94 | 91.26 | 0.03 | 11.43 | 90.62 | 0.02 | 12.49 | 89.90 | 0.03 | 15.05 | 89.90 | 0.08 | 16.22 |
|        |    | 6 | 91.66 | 0.00 | 10.94 | 91.26 | 0.03 | 11.43 | 90.62 | 0.02 | 12.49 | 89.90 | 0.03 | 15.05 | 89.90 | 0.08 | 16.22 |
| Stampy | 60 | 3 | 87.33 | 0.00 | 12.96 | 87.73 | 0.03 | 12.79 | 88.13 | 0.03 | 13.35 | 88.05 | 0.03 | 14.92 | 87.33 | 0.04 | 17.29 |
|        |    | 4 | 87.33 | 0.00 | 12.96 | 87.73 | 0.03 | 12.79 | 88.13 | 0.03 | 13.35 | 88.05 | 0.03 | 14.92 | 87.33 | 0.04 | 17.29 |
|        |    | 5 | 87.33 | 0.00 | 12.96 | 87.73 | 0.03 | 12.79 | 88.13 | 0.03 | 13.35 | 88.05 | 0.03 | 14.92 | 87.33 | 0.04 | 17.29 |
|        |    | 6 | 87.33 | 0.00 | 12.96 | 87.73 | 0.03 | 12.79 | 88.13 | 0.03 | 13.35 | 88.05 | 0.03 | 14.92 | 87.33 | 0.04 | 17.29 |

|  |    |   |       |      |       |       |      |       |       |      |       |       |      |       |       |      |       |
|--|----|---|-------|------|-------|-------|------|-------|-------|------|-------|-------|------|-------|-------|------|-------|
|  | 50 | 3 | 90.46 | 0.00 | 11.34 | 91.18 | 0.03 | 10.95 | 91.02 | 0.03 | 11.77 | 90/78 | 0.04 | 13.45 | 90.54 | 0.08 | 15.76 |
|  |    | 4 | 90.46 | 0.00 | 11.34 | 91.18 | 0.03 | 10.95 | 91.02 | 0.03 | 11.77 | 90/78 | 0.04 | 13.45 | 90.54 | 0.08 | 15.76 |
|  |    | 5 | 90.46 | 0.00 | 11.34 | 91.18 | 0.03 | 10.95 | 91.02 | 0.03 | 11.77 | 90/78 | 0.04 | 13.45 | 90.54 | 0.08 | 15.76 |
|  |    | 6 | 90.46 | 0.00 | 11.34 | 91.18 | 0.03 | 10.95 | 91.02 | 0.03 | 11.77 | 90/78 | 0.04 | 13.45 | 90.54 | 0.08 | 15.76 |

## D

| 1.50% (10-50kb) |          |           | 36    |      |       | 50    |      |       | 76    |       |       | 100   |      |       | 150   |      |       |
|-----------------|----------|-----------|-------|------|-------|-------|------|-------|-------|-------|-------|-------|------|-------|-------|------|-------|
| Aligner         | Bin size | Step size | TP    | FP   | SD    | TP    | FP   | SD    | TP    | FP    | SD    | TP    | FP   | SD    | TP    | FP   | SD    |
| Bfast           | 60       | 3         | 95.83 | 0.89 | 13.47 | 95.83 | 0.85 | 13.56 | 98.33 | 0.66  | 10.81 | 97.08 | 0.56 | 11.55 | 98.33 | 0.43 | 13.17 |
|                 |          | 4         | 95.83 | 0.89 | 13.47 | 95.83 | 0.85 | 13.56 | 98.33 | 0.66  | 10.81 | 97.08 | 0.56 | 11.55 | 98.33 | 0.43 | 13.17 |
|                 |          | 5         | 95.83 | 0.89 | 13.47 | 95.83 | 0.85 | 13.56 | 98.33 | 0.66  | 10.81 | 97.08 | 0.56 | 11.55 | 98.33 | 0.43 | 13.17 |
|                 |          | 6         | 95.83 | 0.89 | 13.47 | 95.83 | 0.85 | 13.56 | 98.33 | 0.66  | 10.81 | 97.08 | 0.56 | 11.55 | 98.33 | 0.43 | 13.17 |
|                 | 50       | 3         | 95.83 | 0.90 | 13.35 | 96.25 | 0.88 | 13.47 | 98.33 | 0.68  | 10.72 | 97.08 | 0.59 | 11.55 | 98.33 | 0.47 | 12.90 |
|                 |          | 4         | 95.83 | 0.90 | 13.35 | 96.25 | 0.88 | 13.47 | 98.33 | 0.68  | 10.72 | 97.08 | 0.59 | 11.55 | 98.33 | 0.47 | 12.90 |
|                 |          | 5         | 95.83 | 0.90 | 13.35 | 96.25 | 0.88 | 13.47 | 98.33 | 0.68  | 10.72 | 97.08 | 0.59 | 11.55 | 98.33 | 0.47 | 12.90 |
|                 |          | 6         | 95.83 | 0.90 | 13.35 | 96.25 | 0.88 | 13.47 | 98.33 | 0.68  | 10.71 | 97.08 | 0.59 | 11.55 | 98.33 | 0.47 | 12.90 |
| BWA             | 60       | 3         | 96.67 | 0.02 | 13.03 | 95.42 | 0.16 | 13.30 | 97.92 | 0.00  | 11.18 | 97.08 | 0.00 | 11.70 | 98.33 | 0.01 | 12.98 |
|                 |          | 4         | 96.67 | 0.02 | 13.03 | 95.42 | 0.16 | 13.20 | 97.92 | 0.00  | 11.18 | 97.08 | 0.00 | 11.70 | 98.33 | 0.01 | 12.98 |
|                 |          | 5         | 96.67 | 0.02 | 13.03 | 95.42 | 0.16 | 13.20 | 97.92 | 0.00  | 11.18 | 97.08 | 0.00 | 11.70 | 98.33 | 0.01 | 12.98 |
|                 |          | 6         | 96.67 | 0.02 | 13.03 | 95.42 | 0.16 | 13.20 | 97.92 | 0.00  | 11.18 | 97.08 | 0.00 | 11.70 | 98.33 | 0.01 | 12.98 |
|                 | 50       | 3         | 96.67 | 0.03 | 12.98 | 95.83 | 0.00 | 13.01 | 98.33 | 0.00  | 10.98 | 97.50 | 0.00 | 11.74 | 98.33 | 0.04 | 12.75 |
|                 |          | 4         | 96.67 | 0.03 | 12.98 | 95.83 | 0.00 | 13.01 | 98.33 | 0.00  | 10.98 | 97.50 | 0.00 | 11.74 | 98.33 | 0.04 | 12.75 |
|                 |          | 5         | 96.67 | 0.03 | 12.98 | 95.83 | 0.00 | 13.01 | 98.33 | 0.00  | 10.98 | 97.50 | 0.00 | 11.74 | 98.33 | 0.04 | 12.75 |
|                 |          | 6         | 96.67 | 0.03 | 12.98 | 95.83 | 0.00 | 13.01 | 98.33 | 0.00  | 10.98 | 97.50 | 0.00 | 11.74 | 98.33 | 0.04 | 12.75 |
| Novo            | 60       | 3         | 95.83 | 0.94 | 13.74 | 96.25 | 0.65 | 13.05 | 77.92 | 44.13 | 71.86 | 97.08 | 0.43 | 11.52 | 98.33 | 0.03 | 12.88 |
|                 |          | 4         | 95.83 | 0.94 | 13.74 | 96.25 | 0.65 | 13.05 | 77.92 | 44.13 | 71.86 | 97.08 | 0.43 | 11.52 | 98.33 | 0.03 | 12.88 |
|                 |          | 5         | 95.83 | 0.94 | 13.74 | 96.25 | 0.65 | 13.05 | 77.92 | 44.13 | 71.86 | 97.08 | 0.43 | 11.52 | 98.33 | 0.03 | 12.88 |
|                 |          | 6         | 95.83 | 0.94 | 13.74 | 96.25 | 0.65 | 13.05 | 77.92 | 44.13 | 71.86 | 97.08 | 0.43 | 11.52 | 98.33 | 0.03 | 12.88 |
|                 | 50       | 3         | 96.25 | 0.97 | 13.49 | 96.25 | 0.66 | 12.91 | 82.50 | 45.99 | 71.72 | 97.08 | 0.45 | 11.48 | 98.33 | 0.08 | 12.71 |
|                 |          | 4         | 96.25 | 0.97 | 13.49 | 96.25 | 0.66 | 12.91 | 82.50 | 45.99 | 71.72 | 97.08 | 0.45 | 11.48 | 98.33 | 0.08 | 12.71 |
|                 |          | 5         | 96.25 | 0.97 | 13.49 | 96.25 | 0.66 | 12.91 | 82.50 | 45.99 | 71.72 | 97.08 | 0.45 | 11.48 | 98.33 | 0.08 | 12.71 |

|        |    |   |       |      |       |       |      |       |       |       |       |       |      |       |       |      |       |
|--------|----|---|-------|------|-------|-------|------|-------|-------|-------|-------|-------|------|-------|-------|------|-------|
|        |    | 6 | 96.25 | 0.97 | 13.49 | 96.25 | 0.66 | 12.91 | 82.50 | 45.99 | 71.72 | 97.08 | 0.45 | 11.48 | 98.33 | 0.08 | 12.71 |
| Smalt  | 60 | 3 | 96.67 | 0.03 | 12.95 | 96.67 | 0.04 | 12.75 | 97.50 | 0.00  | 10.88 | 97.92 | 0.00 | 11.34 | 97.92 | 0.01 | 13.13 |
|        |    | 4 | 96.67 | 0.03 | 12.95 | 96.67 | 0.04 | 12.75 | 97.50 | 0.00  | 10.88 | 97.92 | 0.00 | 11.34 | 97.92 | 0.01 | 13.13 |
|        |    | 5 | 96.67 | 0.03 | 12.95 | 96.67 | 0.04 | 12.75 | 97.50 | 0.00  | 10.88 | 97.92 | 0.00 | 11.34 | 97.92 | 0.01 | 13.13 |
|        |    | 6 | 96.67 | 0.03 | 12.95 | 96.67 | 0.04 | 12.75 | 97.50 | 0.00  | 10.88 | 97.92 | 0.00 | 11.34 | 97.92 | 0.01 | 13.13 |
|        | 50 | 3 | 96.67 | 0.05 | 12.94 | 97.08 | 0.05 | 12.51 | 97.92 | 0.01  | 11.36 | 97.92 | 0.01 | 11.34 | 97.92 | 0.05 | 12.87 |
|        |    | 4 | 96.67 | 0.05 | 12.94 | 97.08 | 0.05 | 12.51 | 97.92 | 0.01  | 11.36 | 97.92 | 0.01 | 11.34 | 97.92 | 0.05 | 12.87 |
|        |    | 5 | 96.67 | 0.05 | 12.94 | 97.08 | 0.05 | 12.51 | 97.92 | 0.01  | 11.36 | 97.92 | 0.01 | 11.34 | 97.92 | 0.05 | 12.87 |
|        |    | 6 | 96.67 | 0.05 | 12.94 | 97.08 | 0.05 | 12.51 | 97.92 | 0.01  | 11.36 | 97.92 | 0.01 | 11.34 | 97.92 | 0.05 | 12.87 |
| Stampy | 60 | 3 | 95.83 | 0.00 | 13.29 | 95.42 | 0.00 | 13.10 | 97.92 | 0.00  | 11.21 | 97.50 | 0.01 | 11.73 | 98.33 | 0.05 | 13.15 |
|        |    | 4 | 95.83 | 0.00 | 13.29 | 95.42 | 0.00 | 13.10 | 97.92 | 0.00  | 11.21 | 97.50 | 0.01 | 11.73 | 98.33 | 0.05 | 13.15 |
|        |    | 5 | 95.83 | 0.00 | 13.29 | 95.42 | 0.00 | 13.10 | 97.92 | 0.00  | 11.21 | 97.50 | 0.01 | 11.73 | 98.33 | 0.05 | 13.15 |
|        |    | 6 | 95.83 | 0.00 | 13.29 | 95.42 | 0.00 | 13.10 | 97.92 | 0.00  | 11.21 | 97.50 | 0.01 | 11.73 | 98.33 | 0.05 | 13.15 |
|        | 50 | 3 | 95.83 | 0.00 | 13.10 | 96.25 | 0.00 | 12.97 | 98.33 | 0.01  | 11.45 | 97.50 | 0.01 | 11.72 | 98.33 | 0.08 | 13.02 |
|        |    | 4 | 95.83 | 0.00 | 13.10 | 96.25 | 0.00 | 12.97 | 98.33 | 0.01  | 11.45 | 97.50 | 0.01 | 11.72 | 98.33 | 0.08 | 13.02 |
|        |    | 5 | 95.83 | 0.00 | 13.10 | 96.25 | 0.00 | 12.97 | 98.33 | 0.01  | 11.45 | 97.50 | 0.01 | 11.72 | 98.33 | 0.08 | 13.02 |
|        |    | 6 | 95.83 | 0.00 | 13.10 | 96.25 | 0.00 | 12.97 | 98.33 | 0.01  | 11.45 | 97.50 | 0.01 | 11.72 | 98.33 | 0.08 | 13.02 |

E

| 1.50% (50kb-1mb) |          |           | 36     |      |      | 50     |      |      | 76     |      |      | 100    |      |      | 150    |      |      |
|------------------|----------|-----------|--------|------|------|--------|------|------|--------|------|------|--------|------|------|--------|------|------|
| Aligner          | Bin size | Step size | TP     | FP   | SD   | TP     | FP   | SD   | TP     | FP   | SD   | TP     | FP   | SD   | TP     | FP   | SD   |
| Bfast            | 60       | 3         | 100.00 | 0.00 | 0.51 | 100.00 | 0.01 | 0.36 | 100.00 | 0.01 | 0.72 | 100.00 | 0.01 | 1.44 | 100.00 | 0.04 | 2.35 |
|                  |          | 4         | 100.00 | 0.00 | 0.51 | 100.00 | 0.01 | 0.36 | 100.00 | 0.01 | 0.72 | 100.00 | 0.01 | 1.44 | 100.00 | 0.04 | 2.35 |
|                  |          | 5         | 100.00 | 0.00 | 0.51 | 100.00 | 0.01 | 0.36 | 100.00 | 0.01 | 0.72 | 100.00 | 0.01 | 1.44 | 100.00 | 0.04 | 2.35 |
|                  |          | 6         | 100.00 | 0.00 | 0.51 | 100.00 | 0.01 | 0.36 | 100.00 | 0.01 | 0.72 | 100.00 | 0.01 | 1.44 | 100.00 | 0.04 | 2.35 |
|                  | 50       | 3         | 100.00 | 0.01 | 0.50 | 100.00 | 0.01 | 0.38 | 100.00 | 0.01 | 0.87 | 100.00 | 0.03 | 1.61 | 100.00 | 0.09 | 2.55 |
|                  |          | 4         | 100.00 | 0.01 | 0.50 | 100.00 | 0.01 | 0.38 | 100.00 | 0.01 | 0.87 | 100.00 | 0.03 | 1.61 | 100.00 | 0.09 | 2.55 |
|                  |          | 5         | 100.00 | 0.01 | 0.50 | 100.00 | 0.01 | 0.38 | 100.00 | 0.01 | 0.87 | 100.00 | 0.03 | 1.61 | 100.00 | 0.09 | 2.55 |
|                  |          | 6         | 100.00 | 0.01 | 0.50 | 100.00 | 0.01 | 0.38 | 100.00 | 0.01 | 0.87 | 100.00 | 0.03 | 1.61 | 100.00 | 0.09 | 2.55 |
| BWA              | 60       | 3         | 100.00 | 0.01 | 0.66 | 100.00 | 0.00 | 0.36 | 100.00 | 0.00 | 0.72 | 100.00 | 0.00 | 1.41 | 100.00 | 0.01 | 2.26 |
|                  |          | 4         | 100.00 | 0.01 | 0.66 | 100.00 | 0.00 | 0.36 | 100.00 | 0.00 | 0.72 | 100.00 | 0.00 | 1.41 | 100.00 | 0.01 | 2.26 |
|                  |          | 5         | 100.00 | 0.01 | 0.66 | 100.00 | 0.00 | 0.36 | 100.00 | 0.00 | 0.72 | 100.00 | 0.00 | 1.41 | 100.00 | 0.01 | 2.26 |

|        |    |   |        |      |      |        |      |      |        |      |      |        |      |      |        |      |      |
|--------|----|---|--------|------|------|--------|------|------|--------|------|------|--------|------|------|--------|------|------|
|        |    | 6 | 100.00 | 0.01 | 0.66 | 100.00 | 0.00 | 0.36 | 100.00 | 0.00 | 0.72 | 100.00 | 0.00 | 1.41 | 100.00 | 0.01 | 2.26 |
|        | 50 | 3 | 100.00 | 0.02 | 0.72 | 100.00 | 0.00 | 0.38 | 100.00 | 0.00 | 0.87 | 100.00 | 0.00 | 1.58 | 100.00 | 0.05 | 2.51 |
|        |    | 4 | 100.00 | 0.02 | 0.72 | 100.00 | 0.00 | 0.38 | 100.00 | 0.00 | 0.87 | 100.00 | 0.00 | 1.58 | 100.00 | 0.05 | 2.51 |
|        |    | 5 | 100.00 | 0.02 | 0.72 | 100.00 | 0.00 | 0.38 | 100.00 | 0.00 | 0.87 | 100.00 | 0.00 | 1.58 | 100.00 | 0.05 | 2.51 |
|        |    | 6 | 100.00 | 0.02 | 0.72 | 100.00 | 0.00 | 0.38 | 100.00 | 0.00 | 0.87 | 100.00 | 0.00 | 1.58 | 100.00 | 0.05 | 2.51 |
| Novo   | 60 | 3 | 100.00 | 0.00 | 0.15 | 100.00 | 0.00 | 0.28 | 100.00 | 0.00 | 0.11 | 100.00 | 0.01 | 1.36 | 100.00 | 0.04 | 2.28 |
|        |    | 4 | 100.00 | 0.00 | 0.15 | 100.00 | 0.00 | 0.28 | 100.00 | 0.00 | 0.11 | 100.00 | 0.01 | 1.36 | 100.00 | 0.04 | 2.28 |
|        |    | 5 | 100.00 | 0.00 | 0.15 | 100.00 | 0.00 | 0.28 | 100.00 | 0.00 | 0.11 | 100.00 | 0.01 | 1.36 | 100.00 | 0.04 | 2.28 |
|        |    | 6 | 100.00 | 0.00 | 0.15 | 100.00 | 0.00 | 0.28 | 100.00 | 0.00 | 0.11 | 100.00 | 0.01 | 1.36 | 100.00 | 0.04 | 2.28 |
|        | 50 | 3 | 100.00 | 0.00 | 0.20 | 100.00 | 0.01 | 0.26 | 100.00 | 0.00 | 0.13 | 100.00 | 0.01 | 1.54 | 100.00 | 0.09 | 2.48 |
|        |    | 4 | 100.00 | 0.00 | 0.20 | 100.00 | 0.01 | 0.26 | 100.00 | 0.00 | 0.13 | 100.00 | 0.01 | 1.54 | 100.00 | 0.09 | 2.48 |
|        |    | 5 | 100.00 | 0.00 | 0.20 | 100.00 | 0.01 | 0.26 | 100.00 | 0.00 | 0.13 | 100.00 | 0.01 | 1.54 | 100.00 | 0.09 | 2.48 |
|        |    | 6 | 100.00 | 0.00 | 0.20 | 100.00 | 0.01 | 0.26 | 100.00 | 0.00 | 0.13 | 100.00 | 0.01 | 1.54 | 100.00 | 0.09 | 2.48 |
| Smalt  | 60 | 3 | 100.00 | 0.02 | 0.37 | 100.00 | 0.01 | 0.72 | 100.00 | 0.00 | 0.76 | 100.00 | 0.00 | 1.98 | 100.00 | 0.01 | 2.35 |
|        |    | 4 | 100.00 | 0.02 | 0.37 | 100.00 | 0.01 | 0.72 | 100.00 | 0.00 | 0.76 | 100.00 | 0.00 | 1.98 | 100.00 | 0.01 | 2.35 |
|        |    | 5 | 100.00 | 0.02 | 0.37 | 100.00 | 0.01 | 0.72 | 100.00 | 0.00 | 0.76 | 100.00 | 0.00 | 1.98 | 100.00 | 0.01 | 2.35 |
|        |    | 6 | 100.00 | 0.02 | 0.37 | 100.00 | 0.01 | 0.72 | 100.00 | 0.00 | 0.76 | 100.00 | 0.00 | 1.98 | 100.00 | 0.01 | 2.35 |
|        | 50 | 3 | 100.00 | 0.03 | 0.38 | 100.00 | 0.02 | 0.75 | 100.00 | 0.00 | 0.94 | 100.00 | 0.01 | 2.08 | 100.00 | 0.05 | 2.53 |
|        |    | 4 | 100.00 | 0.03 | 0.38 | 100.00 | 0.02 | 0.75 | 100.00 | 0.00 | 0.94 | 100.00 | 0.01 | 2.08 | 100.00 | 0.05 | 2.53 |
|        |    | 5 | 100.00 | 0.03 | 0.38 | 100.00 | 0.02 | 0.75 | 100.00 | 0.00 | 0.94 | 100.00 | 0.01 | 2.08 | 100.00 | 0.05 | 2.53 |
|        |    | 6 | 100.00 | 0.03 | 0.38 | 100.00 | 0.02 | 0.75 | 100.00 | 0.00 | 0.94 | 100.00 | 0.01 | 2.08 | 100.00 | 0.05 | 2.53 |
| Stampy | 60 | 3 | 100.00 | 0.00 | 0.56 | 100.00 | 0.00 | 0.35 | 100.00 | 0.00 | 0.76 | 100.00 | 0.01 | 1.42 | 100.00 | 0.01 | 2.38 |
|        |    | 4 | 100.00 | 0.00 | 0.56 | 100.00 | 0.00 | 0.35 | 100.00 | 0.00 | 0.76 | 100.00 | 0.01 | 1.42 | 100.00 | 0.01 | 2.38 |
|        |    | 5 | 100.00 | 0.00 | 0.56 | 100.00 | 0.00 | 0.35 | 100.00 | 0.00 | 0.76 | 100.00 | 0.01 | 1.42 | 100.00 | 0.01 | 2.38 |
|        |    | 6 | 100.00 | 0.00 | 0.56 | 100.00 | 0.00 | 0.35 | 100.00 | 0.00 | 0.76 | 100.00 | 0.01 | 1.42 | 100.00 | 0.01 | 2.38 |
|        | 50 | 3 | 100.00 | 0.00 | 0.58 | 100.00 | 0.00 | 0.36 | 100.00 | 0.00 | 0.96 | 100.00 | 0.01 | 1.59 | 100.00 | 0.04 | 2.62 |
|        |    | 4 | 100.00 | 0.00 | 0.58 | 100.00 | 0.00 | 0.36 | 100.00 | 0.00 | 0.96 | 100.00 | 0.01 | 1.59 | 100.00 | 0.04 | 2.62 |
|        |    | 5 | 100.00 | 0.00 | 0.58 | 100.00 | 0.00 | 0.36 | 100.00 | 0.00 | 0.96 | 100.00 | 0.01 | 1.59 | 100.00 | 0.04 | 2.62 |
|        |    | 6 | 100.00 | 0.00 | 0.58 | 100.00 | 0.00 | 0.36 | 100.00 | 0.00 | 0.96 | 100.00 | 0.01 | 1.59 | 100.00 | 0.04 | 2.62 |

F

| 3.00% (1-5mb) |          |           | 36     |        |      | 50     |        |      | 76     |        |      | 100    |        |      | 150    |        |      |      |
|---------------|----------|-----------|--------|--------|------|--------|--------|------|--------|--------|------|--------|--------|------|--------|--------|------|------|
| Aligner       | Bin size | Step size | TP     | FP     | SD   | TP     | FP     | SD   | TP     | FP     | SD   | TP     | FP     | SD   | TP     | FP     | SD   |      |
| Bfast         | 60       | 3         | 100.00 | 0.00   | 0.33 | 100.00 | 0.00   | 0.32 | 100.00 | 0.01   | 0.39 | 100.00 | 0.58   | 0.98 | 100.00 | 0.05   | 2.22 |      |
|               |          | 4         | 100.00 | 0.00   | 0.33 | 100.00 | 0.00   | 0.32 | 100.00 | 0.01   | 0.39 | 100.00 | 0.58   | 0.98 | 100.00 | 0.05   | 2.22 |      |
|               |          | 5         | 100.00 | 0.00   | 0.33 | 100.00 | 0.00   | 0.32 | 100.00 | 0.01   | 0.39 | 100.00 | 0.58   | 0.98 | 100.00 | 0.05   | 2.22 |      |
|               |          | 6         | 100.00 | 0.00   | 0.33 | 100.00 | 0.00   | 0.32 | 100.00 | 0.01   | 0.39 | 100.00 | 0.58   | 0.98 | 100.00 | 0.05   | 2.72 |      |
|               | 50       | 3         | 100.00 | 0.00   | 0.35 | 100.00 | 0.01   | 0.34 | 100.00 | 0.01   | 0.49 | 100.00 | 0.61   | 1.10 | 100.00 | 0.11   | 2.43 |      |
|               |          | 4         | 100.00 | 0.00   | 0.35 | 100.00 | 0.01   | 0.34 | 100.00 | 0.01   | 0.49 | 100.00 | 0.61   | 1.10 | 100.00 | 0.11   | 2.43 |      |
|               |          | 5         | 100.00 | 0.00   | 0.35 | 100.00 | 0.01   | 0.34 | 100.00 | 0.01   | 0.49 | 100.00 | 0.61   | 1.10 | 100.00 | 0.11   | 2.43 |      |
|               |          | 6         | 100.00 | 0.00   | 0.35 | 100.00 | 0.01   | 0.34 | 100.00 | 0.01   | 0.49 | 100.00 | 0.61   | 1.10 | 100.00 | 0.11   | 2.43 |      |
|               | BWA      | 60        | 3      | 100.00 | 0.01 | 0.71   | 100.00 | 0.00 | 0.34   | 100.00 | 0.00 | 0.46   | 100.00 | 0.00 | 0.89   | 100.00 | 0.02 | 2.19 |
|               |          |           | 4      | 100.00 | 0.01 | 0.71   | 100.00 | 0.00 | 0.34   | 100.00 | 0.00 | 0.46   | 100.00 | 0.00 | 0.89   | 100.00 | 0.02 | 2.19 |
|               |          |           | 5      | 100.00 | 0.01 | 0.71   | 100.00 | 0.00 | 0.34   | 100.00 | 0.00 | 0.46   | 100.00 | 0.00 | 0.89   | 100.00 | 0.02 | 2.19 |
|               |          |           | 6      | 100.00 | 0.01 | 0.71   | 100.00 | 0.00 | 0.34   | 100.00 | 0.00 | 0.46   | 100.00 | 0.00 | 0.89   | 100.00 | 0.02 | 2.19 |
| 50            |          | 3         | 100.00 | 0.03   | 0.80 | 100.00 | 0.00   | 0.36 | 100.00 | 0.00   | 0.55 | 100.00 | 0.00   | 1.04 | 100.00 | 0.07   | 2.39 |      |
|               |          | 4         | 100.00 | 0.03   | 0.80 | 100.00 | 0.00   | 0.36 | 100.00 | 0.00   | 0.55 | 100.00 | 0.00   | 1.04 | 100.00 | 0.07   | 2.39 |      |
|               |          | 5         | 100.00 | 0.03   | 0.80 | 100.00 | 0.00   | 0.36 | 100.00 | 0.00   | 0.55 | 100.00 | 0.00   | 1.04 | 100.00 | 0.07   | 2.39 |      |
|               |          | 6         | 100.00 | 0.03   | 0.80 | 100.00 | 0.00   | 0.36 | 100.00 | 0.00   | 0.55 | 100.00 | 0.00   | 1.04 | 100.00 | 0.07   | 2.39 |      |
| Novo          |          | 60        | 3      | 100.00 | 0.00 | 0.09   | 100.00 | 0.00 | 0.19   | 100.00 | 0.01 | 0.39   | 100.00 | 0.01 | 0.88   | 100.00 | 0.05 | 2.16 |
|               |          |           | 4      | 100.00 | 0.00 | 0.09   | 100.00 | 0.00 | 0.19   | 100.00 | 0.01 | 0.39   | 100.00 | 0.01 | 0.88   | 100.00 | 0.05 | 2.16 |
|               |          |           | 5      | 100.00 | 0.00 | 0.09   | 100.00 | 0.00 | 0.19   | 100.00 | 0.01 | 0.39   | 100.00 | 0.01 | 0.88   | 100.00 | 0.05 | 2.16 |
|               |          |           | 6      | 100.00 | 0.00 | 0.09   | 100.00 | 0.00 | 0.19   | 100.00 | 0.01 | 0.39   | 100.00 | 0.01 | 0.88   | 100.00 | 0.05 | 2.16 |
|               | 50       | 3         | 100.00 | 0.00   | 0.10 | 100.00 | 0.00   | 0.20 | 100.00 | 0.01   | 0.49 | 100.00 | 0.02   | 1.00 | 100.00 | 0.11   | 2.35 |      |
|               |          | 4         | 100.00 | 0.00   | 0.10 | 100.00 | 0.00   | 0.20 | 100.00 | 0.01   | 0.49 | 100.00 | 0.02   | 1.00 | 100.00 | 0.11   | 2.35 |      |
|               |          | 5         | 100.00 | 0.00   | 0.10 | 100.00 | 0.00   | 0.20 | 100.00 | 0.01   | 0.49 | 100.00 | 0.02   | 1.00 | 100.00 | 0.11   | 2.35 |      |
|               |          | 6         | 100.00 | 0.00   | 0.10 | 100.00 | 0.00   | 0.20 | 100.00 | 0.01   | 0.49 | 100.00 | 0.02   | 1.00 | 100.00 | 0.11   | 2.35 |      |
|               | Smalt    | 60        | 3      | 100.00 | 0.02 | 0.37   | 100.00 | 0.01 | 0.71   | 100.00 | 0.00 | 0.59   | 100.00 | 0.00 | 1.34   | 100.00 | 0.02 | 2.26 |
|               |          |           | 4      | 100.00 | 0.02 | 0.37   | 100.00 | 0.01 | 0.71   | 100.00 | 0.00 | 0.59   | 100.00 | 0.00 | 1.34   | 100.00 | 0.02 | 2.26 |
|               |          |           | 5      | 100.00 | 0.02 | 0.37   | 100.00 | 0.01 | 0.71   | 100.00 | 0.00 | 0.59   | 100.00 | 0.00 | 1.34   | 100.00 | 0.02 | 2.26 |
|               |          |           | 6      | 100.00 | 0.02 | 0.37   | 100.00 | 0.01 | 0.71   | 100.00 | 0.00 | 0.59   | 100.00 | 0.00 | 1.34   | 100.00 | 0.02 | 2.26 |
| 50            |          | 3         | 100.00 | 0.03   | 0.40 | 100.00 | 0.01   | 0.85 | 100.00 | 0.00   | 0.70 | 100.00 | 0.01   | 1.59 | 100.00 | 0.08   | 2.51 |      |
|               |          | 4         | 100.00 | 0.03   | 0.40 | 100.00 | 0.01   | 0.85 | 100.00 | 0.00   | 0.70 | 100.00 | 0.01   | 1.59 | 100.00 | 0.08   | 2.51 |      |



|        |    |   |        |      |      |        |      |      |        |      |      |        |      |      |        |      |      |
|--------|----|---|--------|------|------|--------|------|------|--------|------|------|--------|------|------|--------|------|------|
|        |    | 5 | 100.00 | 0.03 | 0.40 | 100.00 | 0.01 | 0.85 | 100.00 | 0.00 | 0.70 | 100.00 | 0.01 | 1.59 | 100.00 | 0.08 | 2.51 |
|        |    | 6 | 100.00 | 0.03 | 0.40 | 100.00 | 0.01 | 0.85 | 100.00 | 0.00 | 0.70 | 100.00 | 0.01 | 1.59 | 100.00 | 0.08 | 2.51 |
| Stampy | 60 | 3 | 100.00 | 0.00 | 0.46 | 100.00 | 0.00 | 0.33 | 100.00 | 0.00 | 0.47 | 100.00 | 0.00 | 0.88 | 100.00 | 0.01 | 3.91 |
|        |    | 4 | 100.00 | 0.00 | 0.46 | 100.00 | 0.00 | 0.33 | 100.00 | 0.00 | 0.47 | 100.00 | 0.00 | 0.88 | 100.00 | 0.01 | 3.17 |
|        |    | 5 | 100.00 | 0.00 | 0.46 | 100.00 | 0.00 | 0.33 | 100.00 | 0.00 | 0.47 | 100.00 | 0.00 | 0.88 | 100.00 | 0.02 | 2.64 |
|        |    | 6 | 100.00 | 0.00 | 0.46 | 100.00 | 0.00 | 0.33 | 100.00 | 0.00 | 0.47 | 100.00 | 0.00 | 0.88 | 100.00 | 0.02 | 2.28 |
|        | 50 | 3 | 100.00 | 0.00 | 0.49 | 100.00 | 0.00 | 0.37 | 100.00 | 0.00 | 0.56 | 100.00 | 0.00 | 1.03 | 100.00 | 0.03 | 3.78 |
|        |    | 4 | 100.00 | 0.00 | 0.49 | 100.00 | 0.00 | 0.37 | 100.00 | 0.00 | 0.56 | 100.00 | 0.00 | 1.03 | 100.00 | 0.04 | 3.18 |
|        |    | 5 | 100.00 | 0.00 | 0.49 | 100.00 | 0.00 | 0.37 | 100.00 | 0.00 | 0.56 | 100.00 | 0.00 | 1.03 | 100.00 | 0.05 | 2.82 |
|        |    | 6 | 100.00 | 0.00 | 0.49 | 100.00 | 0.00 | 0.37 | 100.00 | 0.00 | 0.56 | 100.00 | 0.00 | 1.03 | 100.00 | 0.06 | 2.40 |

COPS found SCNAs with varying numbers of true positives, TP, false positives, FP and size deviation, SD, when tried with simulated data of varying read lengths, 36, 50, 76, 100 and 150 at two bin sizes, 50 and 60, and four step sizes for smoothening  $\log_2$ ratios, 3, 4, 5 and 6, respectively. The simulated data covered 0.05% (A) , 0.10% (B), 1.50% (C-E) and 3% (F) of chr1 with the indicated size ranges of simulated SCNAs, with an average coverage of 15X paired-end reads aligned using five different tools, Bfast, BWA, Novo, Smalt and Stampy.
