# Supplementary material for: COPS: A Sensitive and Accurate Tool for Detecting Somatic Copy Number Alterations Using Short-Read Sequence Data from Paired Samples
Source: PubMed Central journal article supplement (PMC3478291; doi:10.1371/journal.pone.0047812), 2012-10-22
Supplement: pone.0047812.s009.pdf [file pone.0047812.s009.pdf]

Supporting Table 2. Chromosome-wise validation of SCNAs detected by COPS using whole genome SNP microarray.

| Chr | CNA sizes from sequencing reads using COPS | CNA sizes found by using whole genome SNP microarray | % Overlap after adjusting coverage $\geq 1.5X$ | % Overlap after adjusting coverage $\geq 2.5X$ | % Overlap after adjusting coverage $\geq 5X$ | % Overlap after adjusting coverage $\geq 7.5X$ | % Overlap after adjusting coverage $\geq 10X$ | % Overlap after adjusting coverage $\geq 15X$ |
|-----|--------------------------------------------|------------------------------------------------------|------------------------------------------------|------------------------------------------------|----------------------------------------------|------------------------------------------------|-----------------------------------------------|-----------------------------------------------|
| 1   | 39456276                                   | 10773720                                             | 87.43                                          | 93.97                                          | 98.99                                        | 99.84                                          | 99.97                                         | 100.00                                        |
| 2   | 55481916                                   | 23368947                                             | 87.19                                          | 93.73                                          | 98.92                                        | 99.81                                          | 99.97                                         | 100.00                                        |
| 3   | 32994154                                   | 198544                                               | 68.59                                          | 78.09                                          | 89.17                                        | 93.75                                          | 96.12                                         | 97.81                                         |
| 4   | 123756785                                  | 112241762                                            | 87.68                                          | 93.88                                          | 98.83                                        | 99.70                                          | 99.87                                         | 99.91                                         |
| 5   | 36875208                                   | 8142814                                              | 89.63                                          | 94.94                                          | 99.09                                        | 99.83                                          | 99.96                                         | 99.99                                         |
| 6   | 25221070                                   | 835279                                               | 70.19                                          | 79.35                                          | 91.91                                        | 96.92                                          | 98.97                                         | 99.89                                         |
| 7   | 2973684                                    | 8751693                                              | 84.33                                          | 92.36                                          | 98.64                                        | 99.74                                          | 99.93                                         | 99.98                                         |
| 8   | 20361798                                   | 388438                                               | 83.51                                          | 90.70                                          | 97.11                                        | 98.84                                          | 99.43                                         | 99.81                                         |
| 9   | 28267798                                   | 22242420                                             | 90.67                                          | 95.65                                          | 99.29                                        | 99.81                                          | 99.89                                         | 99.93                                         |
| 10  | 52298975                                   | 34672569                                             | 88.25                                          | 94.07                                          | 98.79                                        | 99.64                                          | 99.80                                         | 99.87                                         |
| 11  | 30253616                                   | 6978704                                              | 75.56                                          | 86.68                                          | 97.05                                        | 99.38                                          | 99.87                                         | 99.99                                         |
| 12  | 19433592                                   | 8511                                                 | 89.27                                          | 94.13                                          | 99.41                                        | 100.00                                         | 100.00                                        | 100.00                                        |
| 13  | 15064650                                   | NA*                                                  | NA                                             | NA                                             | NA                                           | NA                                             | NA                                            | NA                                            |
| 14  | 14471659                                   | 745161                                               | 88.88                                          | 93.59                                          | 98.26                                        | 99.58                                          | 99.88                                         | 99.97                                         |
| 15  | 30176985                                   | 15184678                                             | 88.70                                          | 94.53                                          | 99.07                                        | 99.85                                          | 99.98                                         | 100.00                                        |
| 16  | 12237383                                   | 177784                                               | 61.05                                          | 71.88                                          | 85.57                                        | 91.37                                          | 94.32                                         | 97.19                                         |
| 17  | 23814203                                   | 15674745                                             | 87.48                                          | 93.98                                          | 99.00                                        | 99.83                                          | 99.97                                         | 100.00                                        |
| 18  | 11703900                                   | NA                                                   | NA                                             | NA                                             | NA                                           | NA                                             | NA                                            | NA                                            |
| 19  | 13122559                                   | 3015860                                              | 83.03                                          | 91.30                                          | 98.27                                        | 99.55                                          | 99.87                                         | 99.97                                         |
| 20  | 21331257                                   | 14209770                                             | 85.15                                          | 92.56                                          | 98.63                                        | 99.75                                          | 99.96                                         | 100.00                                        |
| 21  | 5182301                                    | 66771                                                | 9.81                                           | 14.23                                          | 26.13                                        | 37.11                                          | 45.50                                         | 61.81                                         |
| 22  | 5395036                                    | NA                                                   | NA                                             | NA                                             | NA                                           | NA                                             | NA                                            | NA                                            |
| X   | 3811262                                    | 20231                                                | 93.60                                          | 96.79                                          | 98.76                                        | 99.51                                          | 99.75                                         | 100.00                                        |
| Y   | 1074159                                    | 470352                                               | 97.01                                          | 98.75                                          | 99.84                                        | 99.99                                          | 100.00                                        | 100.00                                        |
| All | 651523026                                  | 278168753                                            | 80.81                                          | 87.39                                          | 93.85                                        | 95.90                                          | 96.81                                         | 97.91                                         |

\*Not Applicable

Overlapping loci involved in SCNA events were estimated using COPS on tumor:normal mate-pair sequencing data and CNVPartition2.4.4 plugin in GenomeStudio on Omni2.5M SNP array data for the same samples. The overlap was also estimated after systematically omitting reads not satisfying sequencing coverage thresholds of 1.5X, 2.5X, 5X, 7.5X, 10X and 15X, respectively, for either normal or tumor samples.
