# Supplementary material for: COPS: A Sensitive and Accurate Tool for Detecting Somatic Copy Number Alterations Using Short-Read Sequence Data from Paired Samples
Source: PubMed Central journal article supplement (PMC3478291; doi:10.1371/journal.pone.0047812), 2012-10-22
Supplement: pone.0047812.s010.pdf [file pone.0047812.s010.pdf]

Supporting Table 3 Number of SCNAs in each simulated dataset.

The % indicates the %coverage of SCNAs in chr1. The size range of the simulated SCNAs is indicated within parantheses.

| <b>Data simulations</b> | <b>No. of SCNAs</b>                         |
|-------------------------|---------------------------------------------|
| 0.05% (1-10kb)          | 34 [32 <sup>D</sup> ;2 <sup>A</sup> ]       |
| 0.10% (10-50 kb)        | 15 [11 <sup>D</sup> ;4 <sup>A</sup> ]       |
| 1.50% (1-10kb)          | 1247 [1094 <sup>D</sup> ;153 <sup>A</sup> ] |
| 1.50% (10-50kb)         | 240 [195 <sup>D</sup> ;45 <sup>A</sup> ]    |
| 1.50% (50kb-1mb)        | 13 [11 <sup>D</sup> ;2 <sup>A</sup> ]       |
| 3.00% (1-5mb)           | 20 [13 <sup>D</sup> ;7 <sup>A</sup> ]       |

<sup>A</sup>amplification; <sup>D</sup>deletion
