# Supplementary material for: COPS: A Sensitive and Accurate Tool for Detecting Somatic Copy Number Alterations Using Short-Read Sequence Data from Paired Samples
Source: PubMed Central journal article supplement (PMC3478291; doi:10.1371/journal.pone.0047812), 2012-10-22
Supplement: pone.0047812.s011.pdf [file pone.0047812.s011.pdf]

## Supporting Text 1

Commands used to run various CNA/CNV detection tools for performance comparison with COPS:

### 1. CNVnator

```
/Apps/serial/CNVnator/cnvator -chrom chr1 -root stampy--  
chr1_0.05_1000_10000_36_A12_sorted.bam.root -tree stampy--  
chr1_0.05_1000_10000_36_A12_sorted.bam
```

```
/Apps/serial/CNVnator/cnvator -chrom chr1 -root stampy--  
chr1_0.05_1000_10000_36_A12_sorted.bam.root -his 100 -d  
/common/Data/Internal/Others/Reference_genome/Hu_ref/
```

```
/Apps/serial/CNVnator/cnvator -chrom chr1 -root stampy--  
chr1_0.05_1000_10000_36_A12_sorted.bam.root -stat 100
```

```
/Apps/serial/CNVnator/cnvator -chrom chr1 -root stampy--  
chr1_0.05_1000_10000_36_A12_sorted.bam.root -partition 100
```

```
/Apps/serial/CNVnator/cnvator -chrom chr1 -root stampy--  
chr1_0.05_1000_10000_36_A12_sorted.bam.root -call 100 > stampy--  
chr1_0.05_1000_10000_36_A12_sorted.bam.cnv_calls.out
```

### 2. RDXplorer

```
python rdxplorer.py
```

#### **Parameters set in run.sh:**

```
path2bam= 'stampy--chr1_0.05_1000_10000_36_A12_sorted.bam'  
reference= 'chr1.fa'  
wrkdir='stampy_0.05_36_rdxOutput'
```

```
chromOfInterest='1'  
hg= 'hg18'
```

### 3. Freec

```
mkdir freec_out-stampy
```

```
samtools view stampy--chr1_0.05_1000_10000_36_A12_sorted.bam > stampy--  
chr1_0.05_1000_10000_36_A12_sorted.bam.sam
```

```
./freec -conf stampy-config.txt
```

#### **stampy-config.txt:**

```
chrLenFile = chr1.len

ploidy = 2

breakPointThreshold = -.0001

window = 1000

chrFiles = /common/Data/Internal/Others/Reference_genome/Hu_ref/

#numberOfProcesses = 2

#coefficientOfVariation = 0.01

#GCcontentProfile = test/GC_profile_50kb.cnp

outputDir = freec_out-stampy/

#contaminationAdjustment = TRUE

step=500

#minMappabilityPerWindow = 0.95

#gemMappabilityFile = /GEM_mappability/out76.gem

#minExpectedGC=0.35

#maxExpectedGC=0.55

[sample]

mateFile = stampy--chr1_0.05_1000_10000_36_A12_sorted.bam.sam

#mateCopyNumberFile = test/sample.cpn

inputFormat = SAM

mateOrientation = FR

[control]
```

```
#mateFile = /path/control.sam
```

```
#mateCopyNumberFile = path/control.cpn
```

```
#inputFormat = SAM
```

```
#mateOrientation = FR
```

#### 4. CNV-Seq

```
samtools view bwa--chr1_0.05_1000_10000_36_A12_sorted.bam | perl -lane 'print $F[2]\t$F[3]' > bwa--chr1_0.05_1000_10000_36_A12_sorted.bam.hits
```

```
/Apps/serial/cnv-seq/cnv-seq.pl --test bwa--chr1_0.05_1000_10000_36_A12_sorted.bam.hits --ref /ref/36/bwa--ref_chr1_36_sorted.hits --genome chrom1
```

```
R CMD BATCH cnv_seg.R > bwa--chr1_0.05_1000_10000_36_A12_sorted.bam.cnv-seg.txt
```

##### **cnv\_seg.R:**

```
library(cnv)
```

```
ta <- read.delim(bwa--chr1_0.05_1000_10000_36_A12_sorted.bam.hits-vs-novo--ref_chr1_36_sorted.hits.log2-0.6.pvalue-0.001.minw-4.cnv)
```

```
cnv.print(ta)
```

#### 5. SVDetect

```
/SVDetect_r0.7f/bin/SVDetect cnv -conf stampy-sample.cnv.conf
```

##### **stampy-sample.cnv.conf**

```
:
```

```
<general>
```

```
input_format = bam
```

```
sv_type = all
```

```
mates_orientation=FR
```

```
output_dir=stampy-result_200base-bin
```

```
</general>
```

<detection>

tag\_lenght=150

read1\_length=150

read2\_length=150

window\_size=155

step\_length=80

mates\_file=stampy--chr1\_0.05\_1000\_10000\_36\_A12\_sorted.bam

mates\_file\_ref=/ref/36/stampy--ref\_chr1\_36\_sorted.bam

cmap\_file=/SVDetect\_r0.7f/chr1.len

</detection>
