# Supplementary material for: COPS: A Sensitive and Accurate Tool for Detecting Somatic Copy Number Alterations Using Short-Read Sequence Data from Paired Samples
Source: PubMed Central journal article supplement (PMC3478291; doi:10.1371/journal.pone.0047812), 2012-10-22
Supplement: pone.0047812.s012.pdf [file pone.0047812.s012.pdf]

## Supplementary Text 2

In Figure 7 and Supporting Figure 4, the size of a data point is representative of the size deviation (SD) of the detected SCNA. The SD value is scaled down by a factor of 10, before being passed on to the various shapes in the symbols function. The radius of the circle, side of the square, base of the triangle, edge of the star and height of the rectangle are comparable to each other. The size deviation can thus be compared across shapes of datapoints, representative of various aligners being used. The R codes and a sample input file used to generate Figure 7 and Supporting Figure 3 are provided below.

### Sample input file (Bfast\_36\_0.05):-

```
COPS 100 0.1 6.85

RDXplorer 97.06 0.26 11.56

CNVNator 88.24 0.21 12.37

Freec 0 0.48 100

SVDetect 100 119.19 64.21
```

### R code to generate Figure 7:-

```
Bfast76_15_1_1=read.table("Bfast_76_1.50_1_1")

BWA76_15_1_1=read.table("BWA_76_1.50_1_1")

Smalt76_15_1_1=read.table("Smalt_76_1.50_1_1")

Stampy76_15_1_1=read.table("Stampy_76_1.50_1_1")

Novo76_15_1_1=read.table("Novo_76_1.50_1_1")

#par(new=TRUE)

par(mar=c(5,2,1,1),mfrow=c(2,3))

N <- nrow(Bfast76_15_1_1)

with(Bfast76_15_1_1, {

  palette(rainbow(N, end = 0.8))

  symbols(Bfast76_15_1_1$V3, Bfast76_15_1_1$V2, circles=Bfast76_15_1_1$V4/20,
inches=FALSE, fg = 1:N, bg="transparent", main="A
",font.main=2,cex.main=1,just="left",xlab="",ylab="",xlim=c(-10,180),ylim=c(0,130))

  symbols(BWA76_15_1_1$V3, BWA76_15_1_1$V2, squares=BWA76_15_1_1$V4/10,
add=TRUE, inches=FALSE, fg = 1:N, bg="transparent")
```

```
symbols(Smalt76_15_1_1$V3, Smalt76_15_1_1$V2,
rectangles=cbind(Smalt76_15_1_1$V4/15,Smalt76_15_1_1$V4/10), add=TRUE, inches=FALSE,
fg = 1:N, bg="transparent")
```

```
symbols(Stampy76_15_1_1$V3, Stampy76_15_1_1$V2,
stars=cbind(Stampy76_15_1_1$V4/5.773502692,Stampy76_15_1_1$V4/5.773502692,Stampy76_1
5_1_1$V4/5.773502692), add=TRUE, inches=FALSE, fg = 1:N, bg="transparent")
```

```
symbols(Novo76_15_1_1$V3, Novo76_15_1_1$V2,
stars=cbind(Novo76_15_1_1$V4/8.506508084,Novo76_15_1_1$V4/8.506508084,Novo76_15_1_1
$V4/8.506508084,Novo76_15_1_1$V4/8.506508084,Novo76_15_1_1$V4/8.506508084),
add=TRUE, inches=FALSE, fg = 1:N, bg="transparent")
```

```
palette("default")
```

```
})
```

```
Bfast76_15_10_1=read.table("Bfast_76_1.50_10_1")
```

```
BWA76_15_10_1=read.table("BWA_76_1.50_10_1")
```

```
Smalt76_15_10_1=read.table("Smalt_76_1.50_10_1")
```

```
Stampy76_15_10_1=read.table("Stampy_76_1.50_10_1")
```

```
Novo76_15_10_1=read.table("Novo_76_1.50_10_1")
```

```
N <- nrow(Bfast76_15_10_1)
```

```
with(Bfast76_15_10_1, {
```

```
palette(rainbow(N, end = 0.8))
```

```
symbols(Bfast76_15_10_1$V3, Bfast76_15_10_1$V2, circles=Bfast76_15_10_1$V4/20,
inches=FALSE, fg = 1:N, bg="transparent", main="CNA detection
tools",cex.main=1,font.main=2,xlab="",ylab="",xlim=c(-10,180),ylim=c(0,130),yaxt="n")
```

```
symbols(BWA76_15_10_1$V3, BWA76_15_10_1$V2, squares=BWA76_15_10_1$V4/10,
add=TRUE, inches=FALSE, fg = 1:N, bg="transparent")
```

```
symbols(Smalt76_15_10_1$V3, Smalt76_15_10_1$V2,
rectangles=cbind(Smalt76_15_10_1$V4/15,Smalt76_15_10_1$V4/10), add=TRUE,
inches=FALSE, fg = 1:N, bg="transparent")
```

```
symbols(Stampy76_15_10_1$V3, Stampy76_15_10_1$V2,
stars=cbind(Stampy76_15_10_1$V4/5.773502692,Stampy76_15_10_1$V4/5.773502692,Stampy76
_15_10_1$V4/5.773502692), add=TRUE, inches=FALSE, fg = 1:N, bg="transparent")
```

```

symbols(Novo76_15_10_1$V3, Novo76_15_10_1$V2,
stars=cbind(Novo76_15_10_1$V4/8.506508084,Novo76_15_10_1$V4/8.506508084,Novo76_15_1
0_1$V4/8.506508084,Novo76_15_10_1$V4/8.506508084,Novo76_15_10_1$V4/8.506508084),
add=TRUE, inches=FALSE, fg = 1:N, bg="transparent")

```

```

palette("default")

```

```

})

```

```

Bfast76_15_50_1=read.table("Bfast_76_1.50_50_1")

```

```

BWA76_15_50_1=read.table("BWA_76_1.50_50_1")

```

```

Smalt76_15_50_1=read.table("Smalt_76_1.50_50_1")

```

```

Stampy76_15_50_1=read.table("Stampy_76_1.50_50_1")

```

```

Novo76_15_50_1=read.table("Novo_76_1.50_50_1")

```

```

leg.txt <- c("Bfast", "BWA", "Novo", "Smalt", "Stampy")

```

```

N <- nrow(Bfast76_15_50_1)

```

```

with(Bfast76_15_50_1, {

```

```

palette(rainbow(N, end = 0.8))

```

```

symbols(Bfast76_15_50_1$V3, Bfast76_15_50_1$V2, circles=Bfast76_15_50_1$V4/20,
inches=FALSE, fg = 1:N, bg="transparent", xlab="",ylab="",xlim=c(-
10,180),ylim=c(0,130),yaxt="n")

```

```

legend

```

```

(134,10,Bfast76_15_50_1$V1,col=1:N,box.col="transparent",text.col="black",fill=1:N,cex=0.5)

```

```

legend (92,21,legend=leg.txt, box.col="transparent",col="black",
pch=c(1,0,39,2,11),cex=0.6)

```

```

symbols(BWA76_15_50_1$V3, BWA76_15_50_1$V2, squares=BWA76_15_50_1$V4/10,
add=TRUE, inches=FALSE, fg = 1:N, bg="transparent")

```

```

symbols(Smalt76_15_50_1$V3, Smalt76_15_50_1$V2,
rectangles=cbind(Smalt76_15_50_1$V4/15,Smalt76_15_50_1$V4/10), add=TRUE,
inches=FALSE, fg = 1:N, bg="transparent")

```

```

symbols(Stampy76_15_50_1$V3, Stampy76_15_50_1$V2,
stars=cbind(Stampy76_15_50_1$V4/5.773502692,Stampy76_15_50_1$V4/5.773502692,Stampy76
_15_50_1$V4/5.773502692), add=TRUE, inches=FALSE, fg = 1:N, bg="transparent")

```

```
    symbols(Novo76_15_50_1$V3, Novo76_15_50_1$V2,
stars=cbind(Novo76_15_50_1$V4/8.506508084, Novo76_15_50_1$V4/8.506508084, Novo76_15_50_1$V4/8.506508084, Novo76_15_50_1$V4/8.506508084, Novo76_15_50_1$V4/8.506508084, Novo76_15_50_1$V4/8.506508084),
add=TRUE, inches=FALSE, fg = 1:N, bg="transparent")
```

```
palette("default")
```

```
})
```

```
Bfast76_15_1_2=read.table("Bfast_76_1.50_1_2")
```

```
BWA76_15_1_2=read.table("BWA_76_1.50_1_2")
```

```
Smalt76_15_1_2=read.table("Smalt_76_1.50_1_2")
```

```
Stampy76_15_1_2=read.table("Stampy_76_1.50_1_2")
```

```
Novo76_15_1_2=read.table("Novo_76_1.50_1_2")
```

```
N <- nrow(Bfast76_15_1_2)
```

```
with(Bfast76_15_1_2, {
```

```
    palette(rainbow(N, end = 0.5))
```

```
    symbols(Bfast76_15_1_2$V3, Bfast76_15_1_2$V2, circles=Bfast76_15_1_2$V4/20,
inches=FALSE, fg = 1:N, bg="transparent", , main="B
", font.main=2, cex.main=1, sub="1-10kb", cex.sub=1, font.sub=2, xlab="", ylab="", xlim=c(-
40,110), ylim=c(-40,120))
```

```
    symbols(BWA76_15_1_2$V3, BWA76_15_1_2$V2, squares=BWA76_15_1_2$V4/10,
add=TRUE, inches=FALSE, fg = 1:N, bg="transparent")
```

```
    symbols(Smalt76_15_1_2$V3, Smalt76_15_1_2$V2,
rectangles=cbind(Smalt76_15_1_2$V4/15, Smalt76_15_1_2$V4/10), add=TRUE, inches=FALSE,
fg = 1:N, bg="transparent")
```

```
    symbols(Stampy76_15_1_2$V3, Stampy76_15_1_2$V2,
stars=cbind(Stampy76_15_1_2$V4/5.773502692, Stampy76_15_1_2$V4/5.773502692, Stampy76_15_1_2$V4/5.773502692), add=TRUE, inches=FALSE, fg = 1:N, bg="transparent")
```

```
    symbols(Novo76_15_1_2$V3, Novo76_15_1_2$V2,
stars=cbind(Novo76_15_1_2$V4/8.506508084, Novo76_15_1_2$V4/8.506508084, Novo76_15_1_2$V4/8.506508084, Novo76_15_1_2$V4/8.506508084, Novo76_15_1_2$V4/8.506508084, Novo76_15_1_2$V4/8.506508084),
add=TRUE, inches=FALSE, fg = 1:N, bg="transparent")
```

```

palette("default")

})

Bfast76_15_10_2=read.table("Bfast_76_1.50_10_2")
BWA76_15_10_2=read.table("BWA_76_1.50_10_2")
Smalt76_15_10_2=read.table("Smalt_76_1.50_10_2")
Stampy76_15_10_2=read.table("Stampy_76_1.50_10_2")
Novo76_15_10_2=read.table("Novo_76_1.50_10_2")

N <- nrow(Bfast76_15_10_2)

with(Bfast76_15_10_2, {

palette(rainbow(N, end = 0.5))

symbols(Bfast76_15_10_2$V3, Bfast76_15_10_2$V2, circles=Bfast76_15_10_2$V4/20,
inches=FALSE, fg = 1:N, bg="transparent", main="CNV detection tools",cex.main=1,font.main=2,
sub="10-50kb",cex.sub=1,font.sub=2,xlab="",ylab="",xlim=c(-40,110),ylim=c(-40,120),yaxt="n")

symbols(BWA76_15_10_2$V3, BWA76_15_10_2$V2, squares=BWA76_15_10_2$V4/10,
add=TRUE, inches=FALSE, fg = 1:N, bg="transparent")

symbols(Smalt76_15_10_2$V3, Smalt76_15_10_2$V2,
rectangles=cbind(Smalt76_15_10_2$V4/15,Smalt76_15_10_2$V4/10), add=TRUE,
inches=FALSE, fg = 1:N, bg="transparent")

symbols(Stampy76_15_10_2$V3, Stampy76_15_10_2$V2,
stars=cbind(Stampy76_15_10_2$V4/5.773502692,Stampy76_15_10_2$V4/5.773502692,Stampy76
_15_10_2$V4/5.773502692), add=TRUE, inches=FALSE, fg = 1:N, bg="transparent")

symbols(Novo76_15_10_2$V3, Novo76_15_10_2$V2,
stars=cbind(Novo76_15_10_2$V4/8.506508084,Novo76_15_10_2$V4/8.506508084,Novo76_15_1
0_2$V4/8.506508084,Novo76_15_10_2$V4/8.506508084,Novo76_15_10_2$V4/8.506508084),
add=TRUE, inches=FALSE, fg = 1:N, bg="transparent")

palette("default")

})

Bfast76_15_50_2=read.table("Bfast_76_1.50_50_2")
BWA76_15_50_2=read.table("BWA_76_1.50_50_2")

```

```

Smalt76_15_50_2=read.table("Smalt_76_1.50_50_2")

Stampy76_15_50_2=read.table("Stampy_76_1.50_50_2")

Novo76_15_50_2=read.table("Novo_76_1.50_50_2")

N <- nrow(Bfast76_15_50_2)

with(Bfast76_15_50_2, {

  palette(rainbow(N, end = 0.5))

  symbols(Bfast76_15_50_2$V3, Bfast76_15_50_2$V2, circles=Bfast76_15_50_2$V4/20,
inches=FALSE, fg = 1:N, bg="transparent", sub="50kb-
1mb",cex.sub=1,font.sub=2,xlab="",ylab="",xlim=c(-40,110),ylim=c(-40,120),yaxt="n")

  legend (80,-
25,Bfast76_15_50_2$V1,col=1:N,box.col="transparent",text.col="black",fill=1:N,cex=0.5)

  legend (55,-17,legend=leg.txt, box.col="transparent",col="black",
pch=c(1,0,39,2,11),cex=0.6)

  symbols(BWA76_15_50_2$V3, BWA76_15_50_2$V2, squares=BWA76_15_50_2$V4/10,
add=TRUE, inches=FALSE, fg = 1:N, bg="transparent")

  symbols(Smalt76_15_50_2$V3, Smalt76_15_50_2$V2,
rectangles=cbind(Smalt76_15_50_2$V4/15,Smalt76_15_50_2$V4/10), add=TRUE,
inches=FALSE, fg = 1:N, bg="transparent")

  symbols(Stampy76_15_50_2$V3, Stampy76_15_50_2$V2,
stars=cbind(Stampy76_15_50_2$V4/5.773502692,Stampy76_15_50_2$V4/5.773502692,Stampy76
_15_50_2$V4/5.773502692), add=TRUE, inches=FALSE, fg = 1:N, bg="transparent")

  symbols(Novo76_15_50_2$V3, Novo76_15_50_2$V2,
stars=cbind(Novo76_15_50_2$V4/8.506508084,Novo76_15_50_2$V4/8.506508084,Novo76_15_5
0_2$V4/8.506508084,Novo76_15_50_2$V4/8.506508084,Novo76_15_50_2$V4/8.506508084),
add=TRUE, inches=FALSE, fg = 1:N, bg="transparent")

  palette("default")

})

```

### **R code to generate Supporting Figure 3:**

```

Bfast36_5=read.table("Bfast_36_0.05")

BWA36_5=read.table("BWA_36_0.05")

Smalt36_5=read.table("Smalt_36_0.05")

```

Stampy36\_5=read.table("Stampy\_36\_0.05")  
Novo36\_5=read.table("Novo\_36\_0.05")  
Bfast36\_10=read.table("Bfast\_36\_0.10")  
BWA36\_10=read.table("BWA\_36\_0.10")  
Smalt36\_10=read.table("Smalt\_36\_0.10")  
Stampy36\_10=read.table("Stampy\_36\_0.10")  
Novo36\_10=read.table("Novo\_36\_0.10")  
Bfast36\_15\_1=read.table("Bfast\_36\_1.50\_1")  
BWA36\_15\_1=read.table("BWA\_36\_1.50\_1")  
Smalt36\_15\_1=read.table("Smalt\_36\_1.50\_1")  
Stampy36\_15\_1=read.table("Stampy\_36\_1.50\_1")  
Novo36\_15\_1=read.table("Novo\_36\_1.50\_1")  
Bfast36\_15\_10=read.table("Bfast\_36\_1.50\_10")  
BWA36\_15\_10=read.table("BWA\_36\_1.50\_10")  
Smalt36\_15\_10=read.table("Smalt\_36\_1.50\_10")  
Stampy36\_15\_10=read.table("Stampy\_36\_1.50\_10")  
Novo36\_15\_10=read.table("Novo\_36\_1.50\_10")  
Bfast36\_15\_50=read.table("Bfast\_36\_1.50\_50")  
BWA36\_15\_50=read.table("BWA\_36\_1.50\_50")  
Smalt36\_15\_50=read.table("Smalt\_36\_1.50\_50")  
Stampy36\_15\_50=read.table("Stampy\_36\_1.50\_50")  
Novo36\_15\_50=read.table("Novo\_36\_1.50\_50")  
Bfast36\_3=read.table("Bfast\_36\_3")  
BWA36\_3=read.table("BWA\_36\_3")  
Smalt36\_3=read.table("Smalt\_36\_3")  
Stampy36\_3=read.table("Stampy\_36\_3")

```

Novo36_3=read.table("Novo_36_3")

par(mar=c(5,2,1,1),mfrow=c(2,3))

leg.txt <- c("Bfast", "BWA", "Novo", "Smalt", "Stampy")

N <- nrow(Bfast36_5)

  with(Bfast36_5, {

    palette(rainbow(N+1, end = 0.8))

    symbols(Bfast36_5$V3, Bfast36_5$V2, circles=Bfast36_5$V4/20, inches=FALSE, fg =
1:N, bg="transparent", main="A          0.05% (1-10kb)
",font.main=2,cex.main=1,xlab="",ylab="",xlim=c(-15,160),ylim=c(-40,140))

    symbols(BWA36_5$V3, BWA36_5$V2, squares=BWA36_5$V4/10, add=TRUE,
inches=FALSE, fg = 1:N, bg="transparent")

    symbols(Smalt36_5$V3, Smalt36_5$V2,
rectangles=cbind(Smalt36_5$V4/15,Smalt36_5$V4/10), add=TRUE, inches=FALSE, fg = 1:N,
bg="transparent")

    symbols(Stampy36_5$V3, Stampy36_5$V2,
stars=cbind(Stampy36_5$V4/5.773502692,Stampy36_5$V4/5.773502692,Stampy36_5$V4/5.7735
02692), add=TRUE, inches=FALSE, fg = 1:N, bg="transparent")

    symbols(Novo36_5$V3, Novo36_5$V2,
stars=cbind(Novo36_5$V4/8.506508084,Novo36_5$V4/8.506508084,Novo36_5$V4/8.506508084,
Novo36_5$V4/8.506508084,Novo36_5$V4/8.506508084), add=TRUE, inches=FALSE, fg = 1:N,
bg="transparent")

    palette("default")

  })

N <- nrow(Bfast36_10)

  with(Bfast36_10, {

    palette(rainbow(N+1, end = 0.8))

    symbols(Bfast36_10$V3, Bfast36_10$V2, circles=Bfast36_10$V4/20, inches=FALSE, fg =
1:N, bg="transparent", main="0.10% (10-50kb)",font.main=2,cex.main=1,xlab="",ylab="",xlim=c(-
15,160),ylim=c(-40,140))

    symbols(BWA36_10$V3, BWA36_10$V2, squares=BWA36_10$V4/10, add=TRUE,
inches=FALSE, fg = 1:N, bg="transparent")

```

```
symbols(Smalt36_10$V3, Smalt36_10$V2,  
rectangles=cbind(Smalt36_10$V4/15,Smalt36_10$V4/10), add=TRUE, inches=FALSE, fg = 1:N,  
bg="transparent")
```

```
symbols(Stampy36_10$V3, Stampy36_10$V2,  
stars=cbind(Stampy36_10$V4/5.773502692,Stampy36_10$V4/5.773502692,Stampy36_10$V4/5.7  
73502692), add=TRUE, inches=FALSE, fg = 1:N, bg="transparent")
```

```
symbols(Novo36_10$V3, Novo36_10$V2,  
stars=cbind(Novo36_10$V4/8.506508084,Novo36_10$V4/8.506508084,Novo36_10$V4/8.506508  
084,Novo36_10$V4/8.506508084,Novo36_10$V4/8.506508084), add=TRUE, inches=FALSE, fg  
= 1:N, bg="transparent")
```

```
palette("default")
```

```
})
```

```
N <- nrow(Bfast36_15_1)
```

```
with(Bfast36_15_1, {
```

```
palette(rainbow(N+1, end = 0.8))
```

```
symbols(Bfast36_15_1$V3, Bfast36_15_1$V2, circles=Bfast36_15_1$V4/20,  
inches=FALSE, fg = 1:N, bg="transparent", main="1.50% (1-  
10kb)",font.main=2,cex.main=1,xlab="",ylab="",xlim=c(-15,160),ylim=c(-40,140))
```

```
symbols(BWA36_15_1$V3, BWA36_15_1$V2, squares=BWA36_15_1$V4/10,  
add=TRUE, inches=FALSE, fg = 1:N, bg="transparent")
```

```
symbols(Smalt36_15_1$V3, Smalt36_15_1$V2,  
rectangles=cbind(Smalt36_15_1$V4/15,Smalt36_15_1$V4/10), add=TRUE, inches=FALSE, fg =  
1:N, bg="transparent")
```

```
symbols(Stampy36_15_1$V3, Stampy36_15_1$V2,  
stars=cbind(Stampy36_15_1$V4/5.773502692,Stampy36_15_1$V4/5.773502692,Stampy36_15_1$  
V4/5.773502692), add=TRUE, inches=FALSE, fg = 1:N, bg="transparent")
```

```
symbols(Novo36_15_1$V3, Novo36_15_1$V2,  
stars=cbind(Novo36_15_1$V4/8.506508084,Novo36_15_1$V4/8.506508084,Novo36_15_1$V4/8.  
506508084,Novo36_15_1$V4/8.506508084,Novo36_10$V4/8.506508084), add=TRUE,  
inches=FALSE, fg = 1:N, bg="transparent")
```

```
palette("default")
```

```
})
```

```
N <- nrow(Bfast36_15_10)
```

```
with(Bfast36_15_10, {
```

```
  palette(rainbow(N+1, end = 0.8))
```

```
  symbols(Bfast36_15_10$V3, Bfast36_15_10$V2, circles=Bfast36_15_10$V4/20,  
inches=FALSE, fg = 1:N, bg="transparent", main="1.50% (10-  
50kb)", font.main=2, cex.main=1, sub="Read length (36 nts)  
", font.sub=2, cex.sub=1, xlab="", ylab="", xlim=c(-15,160), ylim=c(-40,140))
```

```
  symbols(BWA36_15_10$V3, BWA36_15_10$V2, squares=BWA36_15_10$V4/10,  
add=TRUE, inches=FALSE, fg = 1:N, bg="transparent")
```

```
  symbols(Smalt36_15_10$V3, Smalt36_15_10$V2,  
rectangles=cbind(Smalt36_15_10$V4/15, Smalt36_15_10$V4/10), add=TRUE, inches=FALSE, fg  
= 1:N, bg="transparent")
```

```
  symbols(Stampy36_15_10$V3, Stampy36_15_10$V2,  
stars=cbind(Stampy36_15_10$V4/5.773502692, Stampy36_15_10$V4/5.773502692, Stampy36_15_  
10$V4/5.773502692), add=TRUE, inches=FALSE, fg = 1:N, bg="transparent")
```

```
  symbols(Novo36_15_10$V3, Novo36_15_10$V2,  
stars=cbind(Novo36_15_10$V4/8.506508084, Novo36_15_10$V4/8.506508084, Novo36_15_10$V  
4/8.506508084, Novo36_15_10$V4/8.506508084, Novo36_15_10$V4/8.506508084), add=TRUE,  
inches=FALSE, fg = 1:N, bg="transparent")
```

```
  palette("default")
```

```
})
```

```
N <- nrow(Bfast36_15_50)
```

```
with(Bfast36_15_50, {
```

```
  palette(rainbow(N+1, end = 0.8))
```

```
  symbols(Bfast36_15_50$V3, Bfast36_15_50$V2, circles=Bfast36_15_50$V4/20,  
inches=FALSE, fg = 1:N, bg="transparent", main="1.50% (50kb-  
1mb)", font.main=2, cex.main=1, xlab="", ylab="", xlim=c(-15,160), ylim=c(-40,140))
```

```
  symbols(BWA36_15_50$V3, BWA36_15_50$V2, squares=BWA36_15_50$V4/10,  
add=TRUE, inches=FALSE, fg = 1:N, bg="transparent")
```

```
  symbols(Smalt36_15_50$V3, Smalt36_15_50$V2,  
rectangles=cbind(Smalt36_15_50$V4/15, Smalt36_15_50$V4/10), add=TRUE, inches=FALSE, fg  
= 1:N, bg="transparent")
```

```
  symbols(Stampy36_15_50$V3, Stampy36_15_50$V2,  
stars=cbind(Stampy36_15_50$V4/5.773502692, Stampy36_15_50$V4/5.773502692, Stampy36_15_  
50$V4/5.773502692), add=TRUE, inches=FALSE, fg = 1:N, bg="transparent")
```

```

symbols(Novo36_15_50$V3, Novo36_15_50$V2,
stars=cbind(Novo36_15_50$V4/8.506508084,Novo36_15_50$V4/8.506508084,Novo36_15_50$V
4/8.506508084,Novo36_15_50$V4/8.506508084,Novo36_10$V4/8.506508084), add=TRUE,
inches=FALSE, fg = 1:N, bg="transparent")

```

```

palette("default")

```

```

})

```

```

N <- nrow(Bfast36_3)

```

```

with(Bfast36_3, {

```

```

palette(rainbow(N+1, end = 0.8))

```

```

symbols(Bfast36_3$V3, Bfast36_3$V2, circles=Bfast36_3$V4/20, inches=FALSE, fg =
1:N, bg="transparent", main="3% (1-5mb)",font.main=2,cex.main=1,xlab="",ylab="",xlim=c(-
15,160),ylim=c(-40,140))

```

```

legend (110,-
5,Bfast36_3$V1,col=1:N,box.col="transparent",text.col="black",fill=1:N,cex=0.5)

```

```

legend (80,-4,legend=leg.txt, box.col="transparent",col="black",
pch=c(1,0,39,2,11),cex=0.6)

```

```

symbols(BWA36_3$V3, BWA36_3$V2, squares=BWA36_3$V4/10, add=TRUE,
inches=FALSE, fg = 1:N, bg="transparent")

```

```

symbols(Smalt36_3$V3, Smalt36_3$V2,
rectangles=cbind(Smalt36_3$V4/15,Smalt36_3$V4/10), add=TRUE, inches=FALSE, fg = 1:N,
bg="transparent")

```

```

symbols(Stampy36_3$V3, Stampy36_3$V2,
stars=cbind(Stampy36_3$V4/5.773502692,Stampy36_3$V4/5.773502692,Stampy36_3$V4/5.7735
02692), add=TRUE, inches=FALSE, fg = 1:N, bg="transparent")

```

```

symbols(Novo36_3$V3, Novo36_3$V2,
stars=cbind(Novo36_3$V4/8.506508084,Novo36_3$V4/8.506508084,Novo36_3$V4/8.506508084,
Novo36_3$V4/8.506508084,Novo36_10$V4/8.506508084), add=TRUE, inches=FALSE, fg = 1:N,
bg="transparent")

```

```

palette("default")

```

```

})

```

```

Bfast50_5=read.table("Bfast_50_0.05")

```

BWA50\_5=read.table("BWA\_50\_0.05")  
Smalt50\_5=read.table("Smalt\_50\_0.05")  
Stampy50\_5=read.table("Stampy\_50\_0.05")  
Novo50\_5=read.table("Novo\_50\_0.05")  
Bfast50\_10=read.table("Bfast\_50\_0.10")  
BWA50\_10=read.table("BWA\_50\_0.10")  
Smalt50\_10=read.table("Smalt\_50\_0.10")  
Stampy50\_10=read.table("Stampy\_50\_0.10")  
Novo50\_10=read.table("Novo\_50\_0.10")  
Bfast50\_15\_1=read.table("Bfast\_50\_1.50\_1")  
BWA50\_15\_1=read.table("BWA\_50\_1.50\_1")  
Smalt50\_15\_1=read.table("Smalt\_50\_1.50\_1")  
Stampy50\_15\_1=read.table("Stampy\_50\_1.50\_1")  
Novo50\_15\_1=read.table("Novo\_50\_1.50\_1")  
Bfast50\_15\_10=read.table("Bfast\_50\_1.50\_10")  
BWA50\_15\_10=read.table("BWA\_50\_1.50\_10")  
Smalt50\_15\_10=read.table("Smalt\_50\_1.50\_10")  
Stampy50\_15\_10=read.table("Stampy\_50\_1.50\_10")  
Novo50\_15\_10=read.table("Novo\_50\_1.50\_10")  
Bfast50\_15\_50=read.table("Bfast\_50\_1.50\_50")  
BWA50\_15\_50=read.table("BWA\_50\_1.50\_50")  
Smalt50\_15\_50=read.table("Smalt\_50\_1.50\_50")  
Stampy50\_15\_50=read.table("Stampy\_50\_1.50\_50")  
Novo50\_15\_50=read.table("Novo\_50\_1.50\_50")  
Bfast50\_3=read.table("Bfast\_50\_3")  
BWA50\_3=read.table("BWA\_50\_3")

```

Smalt50_3=read.table("Smalt_50_3")

Stampy50_3=read.table("Stampy_50_3")

Novo50_3=read.table("Novo_50_3")

par(mar=c(5,2,1,1),mfrow=c(2,3))

N <- nrow(Bfast50_5)

with(Bfast50_5, {

  palette(rainbow(N+1, end = 0.8))

  symbols(Bfast50_5$V3, Bfast50_5$V2, circles=Bfast50_5$V4/20, inches=FALSE, fg =
1:N, bg="transparent", main="B          0.05% (1-10kb)
",font.main=2,cex.main=1,xlab="",ylab="",xlim=c(-30,170),ylim=c(-50,150))

  symbols(BWA50_5$V3, BWA50_5$V2, squares=BWA50_5$V4/10, add=TRUE,
inches=FALSE, fg = 1:N, bg="transparent")

  symbols(Smalt50_5$V3, Smalt50_5$V2,
rectangles=cbind(Smalt50_5$V4/15,Smalt50_5$V4/10), add=TRUE, inches=FALSE, fg = 1:N,
bg="transparent")

  symbols(Stampy50_5$V3, Stampy50_5$V2,
stars=cbind(Stampy50_5$V4/5.773502692,Stampy50_5$V4/5.773502692,Stampy50_5$V4/5.7735
02692), add=TRUE, inches=FALSE, fg = 1:N, bg="transparent")

  symbols(Novo50_5$V3, Novo50_5$V2,
stars=cbind(Novo50_5$V4/8.506508084,Novo50_5$V4/8.506508084,Novo50_5$V4/8.506508084,
Novo50_5$V4/8.506508084,Novo50_5$V4/8.506508084), add=TRUE, inches=FALSE, fg = 1:N,
bg="transparent")

  palette("default")

})

N <- nrow(Bfast50_10)

with(Bfast50_10, {

  palette(rainbow(N+1, end = 0.8))

  symbols(Bfast50_10$V3, Bfast50_10$V2, circles=Bfast50_10$V4/20, inches=FALSE, fg =
1:N, bg="transparent", main="0.10% (10-50kb)",font.main=2,cex.main=1,xlab="",ylab="",xlim=c(-
30,170),ylim=c(-50,150))

  symbols(BWA50_10$V3, BWA50_10$V2, squares=BWA50_10$V4/10, add=TRUE,
inches=FALSE, fg = 1:N, bg="transparent")

```

```
symbols(Smalt50_10$V3, Smalt50_10$V2,  
rectangles=cbind(Smalt50_10$V4/15,Smalt50_10$V4/10), add=TRUE, inches=FALSE, fg = 1:N,  
bg="transparent")
```

```
symbols(Stampy50_10$V3, Stampy50_10$V2,  
stars=cbind(Stampy50_10$V4/5.773502692,Stampy50_10$V4/5.773502692,Stampy50_10$V4/5.7  
73502692), add=TRUE, inches=FALSE, fg = 1:N, bg="transparent")
```

```
symbols(Novo50_10$V3, Novo50_10$V2,  
stars=cbind(Novo50_10$V4/8.506508084,Novo50_10$V4/8.506508084,Novo50_10$V4/8.506508  
084,Novo50_10$V4/8.506508084,Novo50_10$V4/8.506508084), add=TRUE, inches=FALSE, fg  
= 1:N, bg="transparent")
```

```
palette("default")
```

```
})
```

```
N <- nrow(Bfast50_15_1)
```

```
with(Bfast50_15_1, {
```

```
palette(rainbow(N+1, end = 0.8))
```

```
symbols(Bfast50_15_1$V3, Bfast50_15_1$V2, circles=Bfast50_15_1$V4/20,  
inches=FALSE, fg = 1:N, bg="transparent", main="1.50% (1-  
10kb)",font.main=2,cex.main=1,xlab="",ylab="",xlim=c(-30,170),ylim=c(-50,150))
```

```
symbols(BWA50_15_1$V3, BWA50_15_1$V2, squares=BWA50_15_1$V4/10,  
add=TRUE, inches=FALSE, fg = 1:N, bg="transparent")
```

```
symbols(Smalt50_15_1$V3, Smalt50_15_1$V2,  
rectangles=cbind(Smalt50_15_1$V4/15,Smalt50_15_1$V4/10), add=TRUE, inches=FALSE, fg =  
1:N, bg="transparent")
```

```
symbols(Stampy50_15_1$V3, Stampy50_15_1$V2,  
stars=cbind(Stampy50_15_1$V4/5.773502692,Stampy50_15_1$V4/5.773502692,Stampy50_15_1$  
V4/5.773502692), add=TRUE, inches=FALSE, fg = 1:N, bg="transparent")
```

```
symbols(Novo50_15_1$V3, Novo50_15_1$V2,  
stars=cbind(Novo50_15_1$V4/8.506508084,Novo50_15_1$V4/8.506508084,Novo50_15_1$V4/8.  
506508084,Novo50_15_1$V4/8.506508084,Novo50_10$V4/8.506508084), add=TRUE,  
inches=FALSE, fg = 1:N, bg="transparent")
```

```
palette("default")
```

```
})
```

```

N <- nrow(Bfast50_15_10)

with(Bfast50_15_10, {

  palette(rainbow(N+1, end = 0.8))

  symbols(Bfast50_15_10$V3, Bfast50_15_10$V2, circles=Bfast50_15_10$V4/20,
inches=FALSE, fg = 1:N, bg="transparent", main="1.50% (10-
50kb)",font.main=2,cex.main=1,sub="Read length (50 nts)
",font.sub=2,cex.sub=1,xlab="",ylab="",xlim=c(-30,170),ylim=c(-50,150))

  symbols(BWA50_15_10$V3, BWA50_15_10$V2, squares=BWA50_15_10$V4/10,
add=TRUE, inches=FALSE, fg = 1:N, bg="transparent")

  symbols(Smalt50_15_10$V3, Smalt50_15_10$V2,
rectangles=cbind(Smalt50_15_10$V4/15,Smalt50_15_10$V4/10), add=TRUE, inches=FALSE, fg
= 1:N, bg="transparent")

  symbols(Stampy50_15_10$V3, Stampy50_15_10$V2,
stars=cbind(Stampy50_15_10$V4/5.773502692,Stampy50_15_10$V4/5.773502692,Stampy50_15_
10$V4/5.773502692), add=TRUE, inches=FALSE, fg = 1:N, bg="transparent")

  symbols(Novo50_15_10$V3, Novo50_15_10$V2,
stars=cbind(Novo50_15_10$V4/8.506508084,Novo50_15_10$V4/8.506508084,Novo50_15_10$V
4/8.506508084,Novo50_15_10$V4/8.506508084,Novo50_10$V4/8.506508084), add=TRUE,
inches=FALSE, fg = 1:N, bg="transparent")

  palette("default")

})

N <- nrow(Bfast50_15_50)

with(Bfast50_15_50, {

  palette(rainbow(N+1, end = 0.8))

  symbols(Bfast50_15_50$V3, Bfast50_15_50$V2, circles=Bfast50_15_50$V4/20,
inches=FALSE, fg = 1:N, bg="transparent", main="1.50% (50kb-
1mb)",font.main=2,cex.main=1,xlab="",ylab="",xlim=c(-30,170),ylim=c(-50,150))

  symbols(BWA50_15_50$V3, BWA50_15_50$V2, squares=BWA50_15_50$V4/10,
add=TRUE, inches=FALSE, fg = 1:N, bg="transparent")

  symbols(Smalt50_15_50$V3, Smalt50_15_50$V2,
rectangles=cbind(Smalt50_15_50$V4/15,Smalt50_15_50$V4/10), add=TRUE, inches=FALSE, fg
= 1:N, bg="transparent")

  symbols(Stampy50_15_50$V3, Stampy50_15_50$V2,
stars=cbind(Stampy50_15_50$V4/5.773502692,Stampy50_15_50$V4/5.773502692,Stampy50_15_

```

```
50$V4/5.773502692), add=TRUE, inches=FALSE, fg = 1:N, bg="transparent")
```

```
  symbols(Novo50_15_50$V3, Novo50_15_50$V2,  
stars=cbind(Novo50_15_50$V4/8.506508084,Novo50_15_50$V4/8.506508084,Novo50_15_50$V  
4/8.506508084,Novo50_15_50$V4/8.506508084,Novo50_10$V4/8.506508084), add=TRUE,  
inches=FALSE, fg = 1:N, bg="transparent")
```

```
  palette("default")
```

```
})
```

```
N <- nrow(Bfast50_3)
```

```
with(Bfast50_3, {
```

```
  palette(rainbow(N+1, end = 0.8))
```

```
  symbols(Bfast50_3$V3, Bfast50_3$V2, circles=Bfast50_3$V4/20, inches=FALSE, fg =  
1:N, bg="transparent", main="3% (1-5mb)",font.main=2,cex.main=1,xlab="",ylab="",xlim=c(-  
30,170),ylim=c(-50,150))
```

```
  legend (110,-  
5,Bfast50_3$V1,col=1:N,box.col="transparent",text.col="black",fill=1:N,cex=0.5)
```

```
  legend (80,-4,legend=leg.txt, box.col="transparent",col="black",  
pch=c(1,0,39,2,11),cex=0.6)
```

```
  symbols(BWA50_3$V3, BWA50_3$V2, squares=BWA50_3$V4/10, add=TRUE,  
inches=FALSE, fg = 1:N, bg="transparent")
```

```
  symbols(Smalt50_3$V3, Smalt50_3$V2,  
rectangles=cbind(Smalt50_3$V4/15,Smalt50_3$V4/10), add=TRUE, inches=FALSE, fg = 1:N,  
bg="transparent")
```

```
  symbols(Stampy50_3$V3, Stampy50_3$V2,  
stars=cbind(Stampy50_3$V4/5.773502692,Stampy50_3$V4/5.773502692,Stampy50_3$V4/5.7735  
02692), add=TRUE, inches=FALSE, fg = 1:N, bg="transparent")
```

```
  symbols(Novo50_3$V3, Novo50_3$V2,  
stars=cbind(Novo50_3$V4/8.506508084,Novo50_3$V4/8.506508084,Novo50_3$V4/8.506508084,  
Novo50_3$V4/8.506508084,Novo50_10$V4/8.506508084), add=TRUE, inches=FALSE, fg = 1:N,  
bg="transparent")
```

```
  palette("default")
```

```
})
```

```
Bfast76_5=read.table("Bfast_76_0.05")
```

```
BWA76_5=read.table("BWA_76_0.05")
Smalt76_5=read.table("Smalt_76_0.05")
Stampy76_5=read.table("Stampy_76_0.05")
Novo76_5=read.table("Novo_76_0.05")
Bfast76_10=read.table("Bfast_76_0.10")
BWA76_10=read.table("BWA_76_0.10")
Smalt76_10=read.table("Smalt_76_0.10")
Stampy76_10=read.table("Stampy_76_0.10")
Novo76_10=read.table("Novo_76_0.10")
Bfast76_15_1=read.table("Bfast_76_1.50_1")
BWA76_15_1=read.table("BWA_76_1.50_1")
Smalt76_15_1=read.table("Smalt_76_1.50_1")
Stampy76_15_1=read.table("Stampy_76_1.50_1")
Novo76_15_1=read.table("Novo_76_1.50_1")
Bfast76_15_10=read.table("Bfast_76_1.50_10")
BWA76_15_10=read.table("BWA_76_1.50_10")
Smalt76_15_10=read.table("Smalt_76_1.50_10")
Stampy76_15_10=read.table("Stampy_76_1.50_10")
Novo76_15_10=read.table("Novo_76_1.50_10")
Bfast76_15_50=read.table("Bfast_76_1.50_50")
BWA76_15_50=read.table("BWA_76_1.50_50")
Smalt76_15_50=read.table("Smalt_76_1.50_50")
Stampy76_15_50=read.table("Stampy_76_1.50_50")
Novo76_15_50=read.table("Novo_76_1.50_50")
Bfast76_3=read.table("Bfast_76_3")
BWA76_3=read.table("BWA_76_3")
```

```

Smalt76_3=read.table("Smalt_76_3")
Stampy76_3=read.table("Stampy_76_3")
Novo76_3=read.table("Novo_76_3")
par(mar=c(5,2,1,1),mfrow=c(2,3))
N <- nrow(Bfast76_5)

with(Bfast76_5, {

  palette(rainbow(N, end = 0.8))

  symbols(Bfast76_5$V3, Bfast76_5$V2, circles=Bfast76_5$V4/20, inches=FALSE, fg =
1:N, bg="transparent", main="C          0.05% (1-10kb)
",font.main=2,cex.main=1,xlab="",ylab="",xlim=c(-50,170),ylim=c(-50,140))

  symbols(BWA76_5$V3, BWA76_5$V2, squares=BWA76_5$V4/10, add=TRUE,
inches=FALSE, fg = 1:N, bg="transparent")

  symbols(Smalt76_5$V3, Smalt76_5$V2,
rectangles=cbind(Smalt76_5$V4/15,Smalt76_5$V4/10), add=TRUE, inches=FALSE, fg = 1:N,
bg="transparent")

  symbols(Stampy76_5$V3, Stampy76_5$V2,
stars=cbind(Stampy76_5$V4/5.773502692,Stampy76_5$V4/5.773502692,Stampy76_5$V4/5.7735
02692), add=TRUE, inches=FALSE, fg = 1:N, bg="transparent")

  symbols(Novo76_5$V3, Novo76_5$V2,
stars=cbind(Novo76_5$V4/8.506508084,Novo76_5$V4/8.506508084,Novo76_5$V4/8.506508084,
Novo76_5$V4/8.506508084,Novo76_5$V4/8.506508084), add=TRUE, inches=FALSE, fg = 1:N,
bg="transparent")

  palette("default")

})

N <- nrow(Bfast76_10)

with(Bfast76_10, {

  palette(rainbow(N, end = 0.8))

  symbols(Bfast76_10$V3, Bfast76_10$V2, circles=Bfast76_10$V4/20, inches=FALSE, fg =
1:N, bg="transparent", main="0.10% (10-50kb)",font.main=2,cex.main=1,xlab="",ylab="",xlim=c(-
50,170),ylim=c(-50,140))

  symbols(BWA76_10$V3, BWA76_10$V2, squares=BWA76_10$V4/10, add=TRUE,

```

```
inches=FALSE, fg = 1:N, bg="transparent")
```

```
  symbols(Smalt76_10$V3, Smalt76_10$V2,  
rectangles=cbind(Smalt76_10$V4/15,Smalt76_10$V4/10), add=TRUE, inches=FALSE, fg = 1:N,  
bg="transparent")
```

```
  symbols(Stampy76_10$V3, Stampy76_10$V2,  
stars=cbind(Stampy76_10$V4/5.773502692,Stampy76_10$V4/5.773502692,Stampy76_10$V4/5.7  
73502692), add=TRUE, inches=FALSE, fg = 1:N, bg="transparent")
```

```
  symbols(Novo76_10$V3, Novo76_10$V2,  
stars=cbind(Novo76_10$V4/8.506508084,Novo76_10$V4/8.506508084,Novo76_10$V4/8.506508  
084,Novo76_10$V4/8.506508084,Novo76_10$V4/8.506508084), add=TRUE, inches=FALSE, fg  
= 1:N, bg="transparent")
```

```
  palette("default")
```

```
  })
```

```
N <- nrow(Bfast76_15_1)
```

```
with(Bfast76_15_1, {
```

```
  palette(rainbow(N, end = 0.8))
```

```
  symbols(Bfast76_15_1$V3, Bfast76_15_1$V2, circles=Bfast76_15_1$V4/20,  
inches=FALSE, fg = 1:N, bg="transparent", main="1.50% (1-  
10kb)",font.main=2,cex.main=1,xlab="",ylab="",xlim=c(-50,170),ylim=c(-50,140))
```

```
  symbols(BWA76_15_1$V3, BWA76_15_1$V2, squares=BWA76_15_1$V4/10,  
add=TRUE, inches=FALSE, fg = 1:N, bg="transparent")
```

```
  symbols(Smalt76_15_1$V3, Smalt76_15_1$V2,  
rectangles=cbind(Smalt76_15_1$V4/15,Smalt76_15_1$V4/10), add=TRUE, inches=FALSE, fg =  
1:N, bg="transparent")
```

```
  symbols(Stampy76_15_1$V3, Stampy76_15_1$V2,  
stars=cbind(Stampy76_15_1$V4/5.773502692,Stampy76_15_1$V4/5.773502692,Stampy76_15_1$  
V4/5.773502692), add=TRUE, inches=FALSE, fg = 1:N, bg="transparent")
```

```
  symbols(Novo76_15_1$V3, Novo76_15_1$V2,  
stars=cbind(Novo76_15_1$V4/8.506508084,Novo76_15_1$V4/8.506508084,Novo76_15_1$V4/8.  
506508084,Novo76_15_1$V4/8.506508084,Novo76_10$V4/8.506508084), add=TRUE,  
inches=FALSE, fg = 1:N, bg="transparent")
```

```
  palette("default")
```

```
  })
```

```

N <- nrow(Bfast76_15_10)

with(Bfast76_15_10, {

  palette(rainbow(N, end = 0.8))

  symbols(Bfast76_15_10$V3, Bfast76_15_10$V2, circles=Bfast76_15_10$V4/20,
inches=FALSE, fg = 1:N, bg="transparent", main="1.50% (10-
50kb)",font.main=2,cex.main=1,xlab="",ylab="",sub="Read length (76 nts)
",font.sub=2,cex.sub=1,xlim=c(-50,170),ylim=c(-50,140))

  symbols(BWA76_15_10$V3, BWA76_15_10$V2, squares=BWA76_15_10$V4/10,
add=TRUE, inches=FALSE, fg = 1:N, bg="transparent")

  symbols(Smalt76_15_10$V3, Smalt76_15_10$V2,
rectangles=cbind(Smalt76_15_10$V4/15,Smalt76_15_10$V4/10), add=TRUE, inches=FALSE, fg
= 1:N, bg="transparent")

  symbols(Stampy76_15_10$V3, Stampy76_15_10$V2,
stars=cbind(Stampy76_15_10$V4/5.773502692,Stampy76_15_10$V4/5.773502692,Stampy76_15_
10$V4/5.773502692), add=TRUE, inches=FALSE, fg = 1:N, bg="transparent")

  symbols(Novo76_15_10$V3, Novo76_15_10$V2,
stars=cbind(Novo76_15_10$V4/8.506508084,Novo76_15_10$V4/8.506508084,Novo76_15_10$V
4/8.506508084,Novo76_15_10$V4/8.506508084,Novo76_15_10$V4/8.506508084), add=TRUE,
inches=FALSE, fg = 1:N, bg="transparent")

  palette("default")

})

```

```

N <- nrow(Bfast76_15_50)

with(Bfast76_15_50, {

  palette(rainbow(N, end = 0.8))

  symbols(Bfast76_15_50$V3, Bfast76_15_50$V2, circles=Bfast76_15_50$V4/20,
inches=FALSE, fg = 1:N, bg="transparent", main="1.50% (50kb-
1mb)",font.main=2,cex.main=1,xlab="",ylab="",xlim=c(-50,170),ylim=c(-50,140))

  symbols(BWA76_15_50$V3, BWA76_15_50$V2, squares=BWA76_15_50$V4/10,
add=TRUE, inches=FALSE, fg = 1:N, bg="transparent")

  symbols(Smalt76_15_50$V3, Smalt76_15_50$V2,
rectangles=cbind(Smalt76_15_50$V4/15,Smalt76_15_50$V4/10), add=TRUE, inches=FALSE, fg
= 1:N, bg="transparent")

  symbols(Stampy76_15_50$V3, Stampy76_15_50$V2,

```

```
stars=cbind(Stampy76_15_50$V4/5.773502692,Stampy76_15_50$V4/5.773502692,Stampy76_15_50$V4/5.773502692), add=TRUE, inches=FALSE, fg = 1:N, bg="transparent")
```

```
  symbols(Novo76_15_50$V3, Novo76_15_50$V2,  
stars=cbind(Novo76_15_50$V4/8.506508084,Novo76_15_50$V4/8.506508084,Novo76_15_50$V4/8.506508084,Novo76_15_50$V4/8.506508084,Novo76_10$V4/8.506508084), add=TRUE,  
inches=FALSE, fg = 1:N, bg="transparent")
```

```
  palette("default")
```

```
  })
```

```
N <- nrow(Bfast76_3)
```

```
with(Bfast76_3, {
```

```
  palette(rainbow(N, end = 0.8))
```

```
  symbols(Bfast76_3$V3, Bfast76_3$V2, circles=Bfast76_3$V4/20, inches=FALSE, fg =  
1:N, bg="transparent", main="3% (1-5mb)",font.main=2,cex.main=1,xlab="",ylab="",xlim=c(-  
50,170),ylim=c(-50,140))
```

```
  legend (110,-  
15,Bfast76_3$V1,col=1:N,box.col="transparent",text.col="black",fill=1:N,cex=0.5)
```

```
  legend (70,-14,legend=leg.txt, box.col="transparent",col="black",  
pch=c(1,0,39,2,11),cex=0.6)
```

```
  symbols(BWA76_3$V3, BWA76_3$V2, squares=BWA76_3$V4/10, add=TRUE,  
inches=FALSE, fg = 1:N, bg="transparent")
```

```
  symbols(Smalt76_3$V3, Smalt76_3$V2,  
rectangles=cbind(Smalt76_3$V4/15,Smalt76_3$V4/10), add=TRUE, inches=FALSE, fg = 1:N,  
bg="transparent")
```

```
  symbols(Stampy76_3$V3, Stampy76_3$V2,  
stars=cbind(Stampy76_3$V4/5.773502692,Stampy76_3$V4/5.773502692,Stampy76_3$V4/5.7735  
02692), add=TRUE, inches=FALSE, fg = 1:N, bg="transparent")
```

```
  symbols(Novo76_3$V3, Novo76_3$V2,  
stars=cbind(Novo76_3$V4/8.506508084,Novo76_3$V4/8.506508084,Novo76_3$V4/8.506508084,  
Novo76_3$V4/8.506508084,Novo76_10$V4/8.506508084), add=TRUE, inches=FALSE, fg = 1:N,  
bg="transparent")
```

```
  palette("default")
```

```
  })
```

Bfast100\_5=read.table("Bfast\_100\_0.05")  
BWA100\_5=read.table("BWA\_100\_0.05")  
Smalt100\_5=read.table("Smalt\_100\_0.05")  
Stampy100\_5=read.table("Stampy\_100\_0.05")  
Novo100\_5=read.table("Novo\_100\_0.05")  
Bfast100\_10=read.table("Bfast\_100\_0.10")  
BWA100\_10=read.table("BWA\_100\_0.10")  
Smalt100\_10=read.table("Smalt\_100\_0.10")  
Stampy100\_10=read.table("Stampy\_100\_0.10")  
Novo100\_10=read.table("Novo\_100\_0.10")  
Bfast100\_15\_1=read.table("Bfast\_100\_1.50\_1")  
BWA100\_15\_1=read.table("BWA\_100\_1.50\_1")  
Smalt100\_15\_1=read.table("Smalt\_100\_1.50\_1")  
Stampy100\_15\_1=read.table("Stampy\_100\_1.50\_1")  
Novo100\_15\_1=read.table("Novo\_100\_1.50\_1")  
Bfast100\_15\_10=read.table("Bfast\_100\_1.50\_10")  
BWA100\_15\_10=read.table("BWA\_100\_1.50\_10")  
Smalt100\_15\_10=read.table("Smalt\_100\_1.50\_10")  
Stampy100\_15\_10=read.table("Stampy\_100\_1.50\_10")  
Novo100\_15\_10=read.table("Novo\_100\_1.50\_10")  
Bfast100\_15\_50=read.table("Bfast\_100\_1.50\_50")  
BWA100\_15\_50=read.table("BWA\_100\_1.50\_50")  
Smalt100\_15\_50=read.table("Smalt\_100\_1.50\_50")  
Stampy100\_15\_50=read.table("Stampy\_100\_1.50\_50")  
Novo100\_15\_50=read.table("Novo\_100\_1.50\_50")  
Bfast100\_3=read.table("Bfast\_100\_3")

```

BWA100_3=read.table("BWA_100_3")

Smalt100_3=read.table("Smalt_100_3")

Stampy100_3=read.table("Stampy_100_3")

Novo100_3=read.table("Novo_100_3")

par(mar=c(5,2,1,1),mfrow=c(2,3))

N <- nrow(Bfast100_5)

  with(Bfast100_5, {

    palette(rainbow(N, end = 0.8))

    symbols(Bfast100_5$V3, Bfast100_5$V2, circles=Bfast100_5$V4/20, inches=FALSE, fg =
1:N, bg="transparent", main="D          0.05% (1-10kb)
",font.main=2,cex.main=1,xlab="",ylab="",xlim=c(-10,160),ylim=c(-10,130))

    symbols(BWA100_5$V3, BWA100_5$V2, squares=BWA100_5$V4/10, add=TRUE,
inches=FALSE, fg = 1:N, bg="transparent")

    symbols(Smalt100_5$V3, Smalt100_5$V2,
rectangles=cbind(Smalt100_5$V4/15,Smalt100_5$V4/10), add=TRUE, inches=FALSE, fg = 1:N,
bg="transparent")

    symbols(Stampy100_5$V3, Stampy100_5$V2,
stars=cbind(Stampy100_5$V4/5.773502692,Stampy100_5$V4/5.773502692,Stampy100_5$V4/5.7
73502692), add=TRUE, inches=FALSE, fg = 1:N, bg="transparent")

    symbols(Novo100_5$V3, Novo100_5$V2,
stars=cbind(Novo100_5$V4/8.506508084,Novo100_5$V4/8.506508084,Novo100_5$V4/8.506508
084,Novo100_5$V4/8.506508084,Novo100_5$V4/8.506508084), add=TRUE, inches=FALSE, fg
= 1:N, bg="transparent")

    palette("default")

  })

N <- nrow(Bfast100_10)

  with(Bfast100_10, {

    palette(rainbow(N, end = 0.8))

    symbols(Bfast100_10$V3, Bfast100_10$V2, circles=Bfast100_10$V4/20, inches=FALSE,
fg = 1:N, bg="transparent", main="0.10% (10-
50kb)",font.main=2,cex.main=1,xlab="",ylab="",xlim=c(-10,160),ylim=c(-10,130))

```

```
symbols(BWA100_10$V3, BWA100_10$V2, squares=BWA100_10$V4/10, add=TRUE,
inches=FALSE, fg = 1:N, bg="transparent")
```

```
symbols(Smalt100_10$V3, Smalt100_10$V2,
rectangles=cbind(Smalt100_10$V4/15,Smalt100_10$V4/10), add=TRUE, inches=FALSE, fg =
1:N, bg="transparent")
```

```
symbols(Stampy100_10$V3, Stampy100_10$V2,
stars=cbind(Stampy100_10$V4/5.773502692,Stampy100_10$V4/5.773502692,Stampy100_10$V4/
5.773502692), add=TRUE, inches=FALSE, fg = 1:N, bg="transparent")
```

```
symbols(Novo100_10$V3, Novo100_10$V2,
stars=cbind(Novo100_10$V4/8.506508084,Novo100_10$V4/8.506508084,Novo100_10$V4/8.506
508084,Novo100_10$V4/8.506508084,Novo100_10$V4/8.506508084), add=TRUE,
inches=FALSE, fg = 1:N, bg="transparent")
```

```
palette("default")
```

```
})
```

```
N <- nrow(Bfast100_15_1)
```

```
with(Bfast100_15_1, {
```

```
palette(rainbow(N, end = 0.8))
```

```
symbols(Bfast100_15_1$V3, Bfast100_15_1$V2, circles=Bfast100_15_1$V4/20,
inches=FALSE, fg = 1:N, bg="transparent", main="1.50% (1-
10kb)",font.main=2,cex.main=1,xlab="",ylab="",xlim=c(-10,160),ylim=c(-10,130))
```

```
symbols(BWA100_15_1$V3, BWA100_15_1$V2, squares=BWA100_15_1$V4/10,
add=TRUE, inches=FALSE, fg = 1:N, bg="transparent")
```

```
symbols(Smalt100_15_1$V3, Smalt100_15_1$V2,
rectangles=cbind(Smalt100_15_1$V4/15,Smalt100_15_1$V4/10), add=TRUE, inches=FALSE, fg
= 1:N, bg="transparent")
```

```
symbols(Stampy100_15_1$V3, Stampy100_15_1$V2,
stars=cbind(Stampy100_15_1$V4/5.773502692,Stampy100_15_1$V4/5.773502692,Stampy100_15
_1$V4/5.773502692), add=TRUE, inches=FALSE, fg = 1:N, bg="transparent")
```

```
symbols(Novo100_15_1$V3, Novo100_15_1$V2,
stars=cbind(Novo100_15_1$V4/8.506508084,Novo100_15_1$V4/8.506508084,Novo100_15_1$V
4/8.506508084,Novo100_15_1$V4/8.506508084,Novo100_15_1$V4/8.506508084), add=TRUE,
inches=FALSE, fg = 1:N, bg="transparent")
```

```
palette("default")
```

```
})
```

```
N <- nrow(Bfast100_15_10)
```

```
with(Bfast100_15_10, {
```

```
  palette(rainbow(N, end = 0.8))
```

```
  symbols(Bfast100_15_10$V3, Bfast100_15_10$V2, circles=Bfast100_15_10$V4/20,  
inches=FALSE, fg = 1:N, bg="transparent", main="1.50% (10-  
50kb)",font.main=2,cex.main=1,xlab="",ylab="",sub="Read length (100 nts)  
",font.sub=2,cex.sub=1,xlim=c(-10,160),ylim=c(-10,130))
```

```
  symbols(BWA100_15_10$V3, BWA100_15_10$V2, squares=BWA100_15_10$V4/10,  
add=TRUE, inches=FALSE, fg = 1:N, bg="transparent")
```

```
  symbols(Smalt100_15_10$V3, Smalt100_15_10$V2,  
rectangles=cbind(Smalt100_15_10$V4/15,Smalt100_15_10$V4/10), add=TRUE, inches=FALSE,  
fg = 1:N, bg="transparent")
```

```
  symbols(Stampy100_15_10$V3, Stampy100_15_10$V2,  
stars=cbind(Stampy100_15_10$V4/5.773502692,Stampy100_15_10$V4/5.773502692,Stampy100_  
15_10$V4/5.773502692), add=TRUE, inches=FALSE, fg = 1:N, bg="transparent")
```

```
  symbols(Novo100_15_10$V3, Novo100_15_10$V2,  
stars=cbind(Novo100_15_10$V4/8.506508084,Novo100_15_10$V4/8.506508084,Novo100_15_10_  
$V4/8.506508084,Novo100_15_10$V4/8.506508084,Novo100_10$V4/8.506508084), add=TRUE,  
inches=FALSE, fg = 1:N, bg="transparent")
```

```
  palette("default")
```

```
})
```

```
N <- nrow(Bfast100_15_50)
```

```
with(Bfast100_15_50, {
```

```
  palette(rainbow(N, end = 0.8))
```

```
  symbols(Bfast100_15_50$V3, Bfast100_15_50$V2, circles=Bfast100_15_50$V4/20,  
inches=FALSE, fg = 1:N, bg="transparent", main="1.50% (50kb-  
1mb)",font.main=2,cex.main=1,xlab="",ylab="",xlim=c(-10,160),ylim=c(-10,130))
```

```
  symbols(BWA100_15_50$V3, BWA100_15_50$V2, squares=BWA100_15_50$V4/10,  
add=TRUE, inches=FALSE, fg = 1:N, bg="transparent")
```

```
  symbols(Smalt100_15_50$V3, Smalt100_15_50$V2,  
rectangles=cbind(Smalt100_15_50$V4/15,Smalt100_15_50$V4/10), add=TRUE, inches=FALSE,  
fg = 1:N, bg="transparent")
```

```
symbols(Stampy100_15_50$V3, Stampy100_15_50$V2,  
stars=cbind(Stampy100_15_50$V4/5.773502692,Stampy100_15_50$V4/5.773502692,Stampy100_  
15_50$V4/5.773502692), add=TRUE, inches=FALSE, fg = 1:N, bg="transparent")
```

```
symbols(Novo100_15_50$V3, Novo100_15_50$V2,  
stars=cbind(Novo100_15_50$V4/8.506508084,Novo100_15_50$V4/8.506508084,Novo100_15_50  
$V4/8.506508084,Novo100_15_50$V4/8.506508084,Novo100_10$V4/8.506508084), add=TRUE,  
inches=FALSE, fg = 1:N, bg="transparent")
```

```
palette("default")
```

```
})
```

```
N <- nrow(Bfast100_3)
```

```
with(Bfast100_3, {
```

```
palette(rainbow(N, end = 0.8))
```

```
symbols(Bfast100_3$V3, Bfast100_3$V2, circles=Bfast100_3$V4/20, inches=FALSE, fg =  
1:N, bg="transparent", main="3% (1-5mb)",font.main=2,cex.main=1,xlab="",ylab="",xlim=c(-  
10,160),ylim=c(-10,130))
```

```
legend
```

```
(110,18,Bfast100_3$V1,col=1:N,box.col="transparent",text.col="black",fill=1:N,cex=0.5)
```

```
legend (80,19,legend=leg.txt, box.col="transparent",col="black",  
pch=c(1,0,39,2,11),cex=0.6)
```

```
symbols(BWA100_3$V3, BWA100_3$V2, squares=BWA100_3$V4/10, add=TRUE,  
inches=FALSE, fg = 1:N, bg="transparent")
```

```
symbols(Smalt100_3$V3, Smalt100_3$V2,  
rectangles=cbind(Smalt100_3$V4/15,Smalt100_3$V4/10), add=TRUE, inches=FALSE, fg = 1:N,  
bg="transparent")
```

```
symbols(Stampy100_3$V3, Stampy100_3$V2,  
stars=cbind(Stampy100_3$V4/5.773502692,Stampy100_3$V4/5.773502692,Stampy100_3$V4/5.7  
73502692), add=TRUE, inches=FALSE, fg = 1:N, bg="transparent")
```

```
symbols(Novo100_3$V3, Novo100_3$V2,  
stars=cbind(Novo100_3$V4/8.506508084,Novo100_3$V4/8.506508084,Novo100_3$V4/8.506508  
084,Novo100_3$V4/8.506508084,Novo100_10$V4/8.506508084), add=TRUE, inches=FALSE, fg  
= 1:N, bg="transparent")
```

```
palette("default")
```

```
})
```

Bfast150\_5=read.table("Bfast\_150\_0.05")  
BWA150\_5=read.table("BWA\_150\_0.05")  
Smalt150\_5=read.table("Smalt\_150\_0.05")  
Stampy150\_5=read.table("Stampy\_150\_0.05")  
Novo150\_5=read.table("Novo\_150\_0.05")  
Bfast150\_10=read.table("Bfast\_150\_0.10")  
BWA150\_10=read.table("BWA\_150\_0.10")  
Smalt150\_10=read.table("Smalt\_150\_0.10")  
Stampy150\_10=read.table("Stampy\_150\_0.10")  
Novo150\_10=read.table("Novo\_150\_0.10")  
Bfast150\_15\_1=read.table("Bfast\_150\_1.50\_1")  
BWA150\_15\_1=read.table("BWA\_150\_1.50\_1")  
Smalt150\_15\_1=read.table("Smalt\_150\_1.50\_1")  
Stampy150\_15\_1=read.table("Stampy\_150\_1.50\_1")  
Novo150\_15\_1=read.table("Novo\_150\_1.50\_1")  
Bfast150\_15\_10=read.table("Bfast\_150\_1.50\_10")  
BWA150\_15\_10=read.table("BWA\_150\_1.50\_10")  
Smalt150\_15\_10=read.table("Smalt\_150\_1.50\_10")  
Stampy150\_15\_10=read.table("Stampy\_150\_1.50\_10")  
Novo150\_15\_10=read.table("Novo\_150\_1.50\_10")  
Bfast150\_15\_50=read.table("Bfast\_150\_1.50\_50")  
BWA150\_15\_50=read.table("BWA\_150\_1.50\_50")  
Smalt150\_15\_50=read.table("Smalt\_150\_1.50\_50")  
Stampy150\_15\_50=read.table("Stampy\_150\_1.50\_50")  
Novo150\_15\_50=read.table("Novo\_150\_1.50\_50")  
Bfast150\_3=read.table("Bfast\_150\_3")

```

BWA150_3=read.table("BWA_150_3")
Smalt150_3=read.table("Smalt_150_3")
Stampy150_3=read.table("Stampy_150_3")
Novo150_3=read.table("Novo_150_3")
par(mar=c(5,2,1,1),mfrow=c(2,3))
N <- nrow(Bfast150_5)

  with(Bfast150_5, {

    palette(rainbow(N, end = 0.8))

    symbols(Bfast150_5$V3, Bfast150_5$V2, circles=Bfast150_5$V4/20, inches=FALSE, fg =
1:N, bg="transparent", main="E          0.05% (1-10kb)
",font.main=2,cex.main=1,xlab="",ylab="",xlim=c(-10,160),ylim=c(-20,130))

    symbols(BWA150_5$V3, BWA150_5$V2, squares=BWA150_5$V4/10, add=TRUE,
inches=FALSE, fg = 1:N, bg="transparent")

    symbols(Smalt150_5$V3, Smalt150_5$V2,
rectangles=cbind(Smalt150_5$V4/15,Smalt150_5$V4/10), add=TRUE, inches=FALSE, fg = 1:N,
bg="transparent")

    symbols(Stampy150_5$V3, Stampy150_5$V2,
stars=cbind(Stampy150_5$V4/5.773502692,Stampy150_5$V4/5.773502692,Stampy150_5$V4/5.7
73502692), add=TRUE, inches=FALSE, fg = 1:N, bg="transparent")

    symbols(Novo150_5$V3, Novo150_5$V2,
stars=cbind(Novo150_5$V4/8.506508084,Novo150_5$V4/8.506508084,Novo150_5$V4/8.506508
084,Novo150_5$V4/8.506508084,Novo150_5$V4/8.506508084), add=TRUE, inches=FALSE, fg
= 1:N, bg="transparent")

    palette("default")

  })

N <- nrow(Bfast150_10)

  with(Bfast150_10, {

    palette(rainbow(N, end = 0.8))

    symbols(Bfast150_10$V3, Bfast150_10$V2, circles=Bfast150_10$V4/20, inches=FALSE,
fg = 1:N, bg="transparent", main="0.10% (10-
50kb)",font.main=2,cex.main=1,xlab="",ylab="",xlim=c(-10,160),ylim=c(-20,130))

```

```
symbols(BWA150_10$V3, BWA150_10$V2, squares=BWA150_10$V4/10, add=TRUE,
inches=FALSE, fg = 1:N, bg="transparent")
```

```
symbols(Smalt150_10$V3, Smalt150_10$V2,
rectangles=cbind(Smalt150_10$V4/15,Smalt150_10$V4/10), add=TRUE, inches=FALSE, fg =
1:N, bg="transparent")
```

```
symbols(Stampy150_10$V3, Stampy150_10$V2,
stars=cbind(Stampy150_10$V4/5.773502692,Stampy150_10$V4/5.773502692,Stampy150_10$V4/
5.773502692), add=TRUE, inches=FALSE, fg = 1:N, bg="transparent")
```

```
symbols(Novo150_10$V3, Novo150_10$V2,
stars=cbind(Novo150_10$V4/8.506508084,Novo150_10$V4/8.506508084,Novo150_10$V4/8.506
508084,Novo150_10$V4/8.506508084,Novo150_10$V4/8.506508084), add=TRUE,
inches=FALSE, fg = 1:N, bg="transparent")
```

```
palette("default")
```

```
})
```

```
N <- nrow(Bfast150_15_1)
```

```
with(Bfast150_15_1, {
```

```
palette(rainbow(N, end = 0.8))
```

```
symbols(Bfast150_15_1$V3, Bfast150_15_1$V2, circles=Bfast150_15_1$V4/20,
inches=FALSE, fg = 1:N, bg="transparent", main="1.50% (1-
10kb)",font.main=2,cex.main=1,xlab="",ylab="",xlim=c(-10,160),ylim=c(-20,130))
```

```
symbols(BWA150_15_1$V3, BWA150_15_1$V2, squares=BWA150_15_1$V4/10,
add=TRUE, inches=FALSE, fg = 1:N, bg="transparent")
```

```
symbols(Smalt150_15_1$V3, Smalt150_15_1$V2,
rectangles=cbind(Smalt150_15_1$V4/15,Smalt150_15_1$V4/10), add=TRUE, inches=FALSE, fg
= 1:N, bg="transparent")
```

```
symbols(Stampy150_15_1$V3, Stampy150_15_1$V2,
stars=cbind(Stampy150_15_1$V4/5.773502692,Stampy150_15_1$V4/5.773502692,Stampy150_15
_1$V4/5.773502692), add=TRUE, inches=FALSE, fg = 1:N, bg="transparent")
```

```
symbols(Novo150_15_1$V3, Novo150_15_1$V2,
stars=cbind(Novo150_15_1$V4/8.506508084,Novo150_15_1$V4/8.506508084,Novo150_15_1$V
4/8.506508084,Novo150_15_1$V4/8.506508084,Novo150_15_1$V4/8.506508084), add=TRUE,
inches=FALSE, fg = 1:N, bg="transparent")
```

```
palette("default")
```

```
})
```

```
N <- nrow(Bfast150_15_10)
```

```
with(Bfast150_15_10, {
```

```
  palette(rainbow(N, end = 0.8))
```

```
  symbols(Bfast150_15_10$V3, Bfast150_15_10$V2, circles=Bfast150_15_10$V4/20,  
inches=FALSE, fg = 1:N, bg="transparent", main="1.50% (10-  
50kb)",font.main=2,cex.main=1,xlab="",ylab="",sub="Read length (150 nts)  
",font.sub=2,cex.sub=1,xlim=c(-10,160),ylim=c(-20,130))
```

```
  symbols(BWA150_15_10$V3, BWA150_15_10$V2, squares=BWA150_15_10$V4/10,  
add=TRUE, inches=FALSE, fg = 1:N, bg="transparent")
```

```
  symbols(Smalt150_15_10$V3, Smalt150_15_10$V2,  
rectangles=cbind(Smalt150_15_10$V4/15,Smalt150_15_10$V4/10), add=TRUE, inches=FALSE,  
fg = 1:N, bg="transparent")
```

```
  symbols(Stampy150_15_10$V3, Stampy150_15_10$V2,  
stars=cbind(Stampy150_15_10$V4/5.773502692,Stampy150_15_10$V4/5.773502692,Stampy150_  
15_10$V4/5.773502692), add=TRUE, inches=FALSE, fg = 1:N, bg="transparent")
```

```
  symbols(Novo150_15_10$V3, Novo150_15_10$V2,  
stars=cbind(Novo150_15_10$V4/8.506508084,Novo150_15_10$V4/8.506508084,Novo150_15_10  
$V4/8.506508084,Novo150_15_10$V4/8.506508084,Novo150_10$V4/8.506508084), add=TRUE,  
inches=FALSE, fg = 1:N, bg="transparent")
```

```
  palette("default")
```

```
})
```

```
N <- nrow(Bfast150_15_50)
```

```
with(Bfast150_15_50, {
```

```
  palette(rainbow(N, end = 0.8))
```

```
  symbols(Bfast150_15_50$V3, Bfast150_15_50$V2, circles=Bfast150_15_50$V4/20,  
inches=FALSE, fg = 1:N, bg="transparent", main="1.50% (50kb-  
1mb)",font.main=2,cex.main=1,xlab="",ylab="",xlim=c(-10,160),ylim=c(-20,130))
```

```
  symbols(BWA150_15_50$V3, BWA150_15_50$V2, squares=BWA150_15_50$V4/10,  
add=TRUE, inches=FALSE, fg = 1:N, bg="transparent")
```

```
  symbols(Smalt150_15_50$V3, Smalt150_15_50$V2,  
rectangles=cbind(Smalt150_15_50$V4/15,Smalt150_15_50$V4/10), add=TRUE, inches=FALSE,  
fg = 1:N, bg="transparent")
```

```
symbols(Stampy150_15_50$V3, Stampy150_15_50$V2,
stars=cbind(Stampy150_15_50$V4/5.773502692,Stampy150_15_50$V4/5.773502692,Stampy150_
15_50$V4/5.773502692), add=TRUE, inches=FALSE, fg = 1:N, bg="transparent")
```

```
symbols(Novo150_15_50$V3, Novo150_15_50$V2,
stars=cbind(Novo150_15_50$V4/8.506508084,Novo150_15_50$V4/8.506508084,Novo150_15_50
$V4/8.506508084,Novo150_15_50$V4/8.506508084,Novo150_10$V4/8.506508084), add=TRUE,
inches=FALSE, fg = 1:N, bg="transparent")
```

```
palette("default")
```

```
})
```

```
N <- nrow(Bfast150_3)
```

```
with(Bfast150_3, {
```

```
palette(rainbow(N, end = 0.8))
```

```
symbols(Bfast150_3$V3, Bfast150_3$V2, circles=Bfast150_3$V4/20, inches=FALSE, fg =
1:N, bg="transparent", main="3% (1-5mb)",font.main=2,cex.main=1,xlab="",ylab="",xlim=c(-
10,160),ylim=c(-20,130))
```

```
legend
```

```
(110,6,Bfast100_3$V1,col=1:N,box.col="transparent",text.col="black",fill=1:N,cex=0.5)
```

```
legend(80,7,legend=leg.txt, box.col="transparent",col="black",
pch=c(1,0,39,2,11),cex=0.6)
```

```
symbols(BWA150_3$V3, BWA150_3$V2, squares=BWA150_3$V4/10, add=TRUE,
inches=FALSE, fg = 1:N, bg="transparent")
```

```
symbols(Smalt150_3$V3, Smalt150_3$V2,
rectangles=cbind(Smalt150_3$V4/15,Smalt150_3$V4/10), add=TRUE, inches=FALSE, fg = 1:N,
bg="transparent")
```

```
symbols(Stampy150_3$V3, Stampy150_3$V2,
stars=cbind(Stampy150_3$V4/5.773502692,Stampy150_3$V4/5.773502692,Stampy150_3$V4/5.7
73502692), add=TRUE, inches=FALSE, fg = 1:N, bg="transparent")
```

```
symbols(Novo150_3$V3, Novo150_3$V2,
stars=cbind(Novo150_3$V4/8.506508084,Novo150_3$V4/8.506508084,Novo150_3$V4/8.506508
084,Novo150_3$V4/8.506508084,Novo150_10$V4/8.506508084), add=TRUE, inches=FALSE, fg
= 1:N, bg="transparent")
```

```
palette("default")
```

})
